# Supplementary material
Source: publisher site journal article supplement (https://cdn.jamanetwork.com/ama/content_public/journal/jama/936454/jpc170004supp2_prod.xlsx)
Supplement: Supplementary file 1 [file jpc170004supp2_prod.xlsx]

## Sheet: eTable
			eTable. Variants of Uncertain Significance (VUS) detected; a total of 1861 (1186 unique) variants of uncertain significance were detected in the 1040 cases in this cohort.
	GENE	cDNA	PROTEIN	CHROMOSOME NUMBER	CHROMOSOME POSITION	TRANSCRIPT	REF	ALT	ClinVar ID	ExAC	Maximum ExAC Frequency	ExAC Minus TCGA
	ALK	c.106C>T	p.Pro36Ser	2	30143420	NM_004304	G	A	133457	0.0010	OTH: 0.0019	0.000638
	ALK	c.1108G>A	p.Glu370Lys	2	29754827	NM_004304	C	T	NA	5.767e-05	AFR: 0.0003	5.649e-05
	ALK	c.1118G>T	p.Arg373Ile	2	29754817	NM_004304	C	A	NA	0	0	0
	ALK	c.1215A>T	p.Glu405Asp	2	29606665	NM_004304	T	A	133484	0.0005	SAS: 0.0035	0.0005273
	ALK	c.1234C>T	p.Arg412Cys	2	29606646	NM_004304	G	A	239794	0.0004	AFR: 0.0007	0.0003766
	ALK	c.1427T>C	p.Val476Ala	2	29543736	NM_004304	A	G	133485	0.0293	NFE: 0.0403	0.029
	ALK	c.1648C>T	p.Leu550Phe	2	29519923	NM_004304	G	A	NA	0.0002	EAS: 0.0022	0.0001789
	ALK	c.1787T>C	p.Met596Thr	2	29519784	NM_004304	A	G	NA	1.65e-05	NFE: 3e-05	1.883e-05
	ALK	c.1943C>T	p.Thr648Ile	2	29498063	NM_004304	G	A	133461	0.0007	AFR: 0.0081	0.0006873
	ALK	c.2147G>T	p.Ser716Ile	2	29474028	NM_004304	C	A	NA	0	0	0
	ALK	c.2149G>A	p.Glu717Lys	2	29474026	NM_004304	C	T	239802	0.0002	OTH: 0.0011	0.0002166
	ALK	c.2526C>T	p.Ala842Ala	2	29455276	NM_004304	G	A	239807	0.0006	SAS: 0.0027	0.0006873
	ALK	c.2554A>G	p.Lys852Glu	2	29455248	NM_004304	T	C	NA	2.471e-05	OTH: 0.0011	1.883e-05
	ALK	c.269C>T	p.Ser90Leu	2	30143257	NM_004304	G	A	NA	0.0002	SAS: 0.0002	3.831e-05
	ALK	c.3057C>A	p.Val1019Val	2	29449798	NM_004304	G	T	335698	0.0026	0	0.002825
	ALK	c.3067+12_3067+15delGGGC		2	29449772	NM_004304	GGCCC	G	335732	0	0	0
	ALK	c.310C>T	p.Pro104Ser	2	30143216	NM_004304	G	A	239819	0.0001	AFR: 0.0022	3.05e-05
	ALK	c.3139G>A	p.Ala1047Thr	2	29448360	NM_004304	C	T	133468	0.0005	SAS: 0.0033	0.000565
	ALK	c.3182G>A	p.Arg1061Gln	2	29446385	NM_004304	C	T	133470	0.0001	SAS: 0.0003	0.0001036
	ALK	c.3338G>A	p.Arg1113Gln	2	29446229	NM_004304	C	T	NA	4.945e-05	NFE: 8.993e-05	4.708e-05
	ALK	c.3362G>A	p.Gly1121Asp	2	29445471	NM_004304	C	T	NA	6.142e-05	AFR: 0.0001	6.591e-05
	ALK	c.3481G>A	p.Glu1161Lys	2	29445244	NM_004304	C	T	NA	3.316e-05	AFR: 0.0002	2.825e-05
	ALK	c.3482A>C	p.Glu1161Ala	2	29445243	NM_004304	T	G	335732	0	0	0
	ALK	c.3515+18C>T		2	29445192	NM_004304	G	A	NA	0.0056	FIN: 0.0125	0.005338
	ALK	c.3645G>A	p.Pro1215Pro	2	29443572	NM_004304	C	T	335732	8.272e-05	NFE: 0.0002	9.415e-05
	ALK	c.3742C>T	p.Arg1248*	2	29436851	NM_004304	G	A	NA	4.944e-05	AFR: 9.614e-05	4.708e-05
	ALK	c.3812T>A	p.Phe1271Tyr	2	29432676	NM_004304	A	T	335732	0	0	0
	ALK	c.4164G>A	p.Gln1388Gln	2	29419636	NM_004304	C	T	NA	6.59e-05	SAS: 0.0005	7.532e-05
	ALK	c.469C>T	p.Pro157Ser	2	30143057	NM_004304	G	A	239842	0.0003	0	0.0001605
	ALK	c.4724G>A	p.Arg1575His	2	29416229	NM_004304	C	T	NA	2.471e-05	0	9.415e-06
	ALK	c.4796C>A	p.Pro1599His	2	29416157	NM_004304	G	T	133477	0.0002	AFR: 0.0022	0.0002071
	ALK	c.4801G>A	p.Ala1601Thr	2	29416152	NM_004304	C	T	NA	4.944e-05	NFE: 8.992e-05	3.766e-05
	ALK	c.597C>T	p.Gly199Gly	2	30142929	NM_004304	G	A	335711	0.0002	OTH: 0.0011	0.0002071
	ALK	c.692C>G	p.Thr231Arg	2	29940539	NM_004304	G	C	NA	2.471e-05	AFR: 0.0003	2.825e-05
	ALK	c.808T>C	p.Phe270Leu	2	29917860	NM_004304	A	G	133481	0.0001	NFE: 0.0002	0.0001224
	ALK	c.932G>A	p.Arg311His	2	29917736	NM_004304	C	T	133480	0.0005	AFR: 0.0014	0.0004331
	ALK	c.989A>G	p.Lys330Arg	2	29754946	NM_004304	T	C	NA	8.245e-06	NFE: 1.499e-05	9.415e-06
	APC	c.120G>A	p.Glu40Glu	5	112090707	NM_000038	G	A	135683	0.0007	AFR: 0.0055	0.0006214
	APC	c.1631T>C	p.Ile544Thr	5	112164557	NM_000038	T	C	41520	0.0001	NFE: 0.0003	0.0001318
	APC	c.1825G>A	p.Val609Ile	5	112170729	NM_000038	G	A	127278	0.0004	AFR: 0.0042	0.0003766
	APC	c.2360G>A	p.Ser787Asn	5	112173651	NM_000038	G	A	NA	0	0	0
	APC	c.2387A>G	p.Tyr796Cys	5	112173678	NM_000038	A	G	NA	0	0	0
	APC	c.2792A>T	p.His931Leu	5	112174083	NM_000038	A	T	350456	0	0	0
	APC	c.3245C>G	p.Thr1082Ser	5	112174536	NM_000038	C	G	181799	4.977e-05	FIN: 0.0003	5.649e-05
	APC	c.3343G>C	p.Val1115Leu	5	112174634	NM_000038	G	C	NA	0	0	0
	APC	c.3437G>A	p.Arg1146His	5	112174728	NM_000038	G	A	NA	3.313e-05	EAS: 0.0001	2.825e-05
	APC	c.343A>G	p.Met115Val	5	112103008	NM_000038	A	G	NA	0	0	0
	APC	c.3468_3470delAGA	p.Glu1157del	5	112174750	NM_000038	TGAA	T	41527	0.0012	AFR: 0.0131	0.001271
	APC	c.3479C>A	p.Thr1160Lys	5	112174770	NM_000038	C	A	41503	9.953e-05	NFE: 0.0002	9.416e-05
	APC	c.3511C>T	p.Arg1171Cys	5	112174802	NM_000038	C	T	133518	0.0003	AMR: 0.0015	0.0002636
	APC	c.3650A>C	p.Asn1217Thr	5	112174941	NM_000038	A	C	133509	0.0002	AFR: 0.0025	0.0002166
	APC	c.388A>G	p.Ser130Gly	5	112103053	NM_000038	A	G	41505	0.0002	NFE: 0.0004	0.0001695
	APC	c.3949G>C	p.Glu1317Gln	5	112175240	NM_000038	G	C	829	0.0041	NFE: 0.0057	0.003879
	APC	c.3964G>A	p.Glu1322Lys	5	112175255	NM_000038	G	A	232718	1.651e-05	SAS: 6.059e-05	1.883e-05
	APC	c.4088A>T	p.Lys1363Ile	5	112175379	NM_000038	A	T	350456	1.65e-05	0	0
	APC	c.4483A>G	p.Ser1495Gly	5	112175774	NM_000038	A	G	NA	0	0	0
	APC	c.4597A>G	p.Asn1533Asp	5	112175888	NM_000038	A	G	181772	0	0	0
	APC	c.4669A>G	p.Ile1557Val	5	112175960	NM_000038	A	G	245712	0.0001	NFE: 0.0002	0.0001318
	APC	c.5026A>G	p.Arg1676Gly	5	112176317	NM_000038	A	G	127302	0.0001	SAS: 0.0002	0.0001412
	APC	c.5365G>C	p.Val1789Leu	5	112176656	NM_000038	G	C	NA	0	0	0
	APC	c.5603A>G	p.Asp1868Gly	5	112176894	NM_000038	A	G	184835	0	0	0
	APC	c.5801C>T	p.Pro1934Leu	5	112177092	NM_000038	C	T	135709	0.0001	AMR: 0.0005	0.000113
	APC	c.5858A>T	p.Asn1953Ile	5	112177149	NM_000038	A	T	350456	0	0	0
	APC	c.5914C>T	p.Leu1972Phe	5	112177205	NM_000038	C	T	NA	0	0	0
	APC	c.5974C>T	p.Pro1992Ser	5	112177265	NM_000038	C	T	NA	8.29e-06	SAS: 6.061e-05	9.416e-06
	APC	c.5998A>G	p.Ser2000Gly	5	112177289	NM_000038	A	G	142160	0	0	0
	APC	c.607C>G	p.Gln203Glu	5	112116562	NM_000038	C	G	41509	0.0005	NFE: 0.0009	0.0004143
	APC	c.6230C>T	p.Thr2077Ile	5	112177521	NM_000038	C	T	NA	8.254e-06	SAS: 6.061e-05	9.415e-06
	APC	c.647G>A	p.Arg216Gln	5	112128144	NM_000038	G	A	188275	6.928e-05	AFR: 0.0002	6.591e-05
	APC	c.6782C>T	p.Pro2261Leu	5	112178073	NM_000038	C	T	141681	4.135e-05	AFR: 0.0005	2.825e-05
	APC	c.6821C>T	p.Ala2274Val	5	112178112	NM_000038	C	T	41511	0.0010	OTH: 0.0044	0.0009604
	APC	c.6873A>T	p.Gln2291His	5	112178164	NM_000038	A	T	41534	0.0001	NFE: 0.0002	0.0001036
	APC	c.6985A>G	p.Ile2329Val	5	112178276	NM_000038	A	G	135716	0.0003	NFE: 0.0004	0.000226
	APC	c.7036C>T	p.Pro2346Ser	5	112178327	NM_000038	C	T	41512	0.0003	NFE: 0.0006	0.000339
	APC	c.7147G>C	p.Gly2383Arg	5	112178438	NM_000038	G	C	350456	0	0	0
	APC	c.7399C>A	p.Pro2467Thr	5	112178690	NM_000038	C	A	127318	0.0001	SAS: 0.0002	0.0001412
	APC	c.7490C>T	p.Ser2497Leu	5	112178781	NM_000038	C	T	133522	0.0003	NFE: 0.0006	0.0002636
	APC	c.7654A>G	p.Ser2552Gly	5	112178945	NM_000038	A	G	350456	0	0	0
	APC	c.8107A>G	p.Lys2703Glu	5	112179398	NM_000038	A	G	181829	1.648e-05	NFE: 2.997e-05	0
	APC	c.821C>T	p.Ser274Phe	5	112137067	NM_000038	C	T	NA	0	0	0
	APC	c.8229T>G	p.Asn2743Lys	5	112179520	NM_000038	T	G	350456	0	0	0
	APC	c.8332G>T	p.Ala2778Ser	5	112179623	NM_000038	G	T	133537	0.0002	EAS: 0.0023	0.0002071
	ATM	c.1066-6T>G		11	108119654	NM_000051	T	G	3038	0.0013	OTH: 0.0023	0.001093
	ATM	c.1073A>G	p.Asn358Ser	11	108119667	NM_000051	A	G	127329	0.0002	AFR: 0.0022	0.0001978
	ATM	c.10G>T	p.Val4Leu	11	108098361	NM_000051	G	T	NA	0	0	0
	ATM	c.1229T>C	p.Val410Ala	11	108119823	NM_000051	T	C	127332	0.0022	NFE: 0.0033	0.002034
	ATM	c.1351C>T	p.Arg451Cys	11	108121543	NM_000051	C	T	185437	0.0001	SAS: 0.0006	0.0001412
	ATM	c.1444A>C	p.Lys482Gln	11	108121636	NM_000051	A	C	127338	6.593e-05	NFE: 0.0001	7.532e-05
	ATM	c.146C>G	p.Ser49Cys	11	108098576	NM_000051	C	G	3048	0.0074	NFE: 0.0113	0.007062
	ATM	c.1703G>T	p.Arg568Ile	11	108122659	NM_000051	G	T	140916	0.0001	OTH: 0.0011	9.415e-05
	ATM	c.1810C>T	p.Pro604Ser	11	108123551	NM_000051	C	T	127343	0.0031	AFR: 0.0067	0.002788
	ATM	c.1837G>T	p.Val613Leu	11	108123578	NM_000051	G	T	181922	4.256e-05	AMR: 8.957e-05	1.883e-05
	ATM	c.2021A>G	p.His674Arg	11	108124663	NM_000051	A	G	141183	0.0002	OTH: 0.0022	0.0001601
	ATM	c.2119T>C	p.Ser707Pro	11	108124761	NM_000051	T	C	128454	0.0079	OTH: 0.0112	0.007466
	ATM	c.2260C>A	p.Gln754Lys	11	108128217	NM_000051	C	A	141496	0	0	0
	ATM	c.2289T>A	p.Phe763Leu	11	108128246	NM_000051	T	A	127347	0.0005	OTH: 0.0033	0.0005179
	ATM	c.238C>A	p.Pro80Thr	11	108099957	NM_000051	C	A	NA	0	0	0
	ATM	c.2446G>C	p.Ala816Pro	11	108129782	NM_000051	G	C	NA	0	0	0
	ATM	c.2447C>T	p.Ala816Val	11	108129783	NM_000051	C	T	NA	0	0	0
	ATM	c.2527A>G	p.Asn843Asp	11	108137958	NM_000051	A	G	NA	0	0	0
	ATM	c.2603A>G	p.Asp868Gly	11	108138034	NM_000051	A	G	NA	4.946e-05	FIN: 0.0006	5.649e-05
	ATM	c.2770C>T	p.Arg924Trp	11	108139268	NM_000051	C	T	127358	4.942e-05	NFE: 7.492e-05	5.649e-05
	ATM	c.2887A>G	p.Met963Val	11	108141839	NM_000051	A	G	142966	4.124e-05	AFR: 0.0004	3.766e-05
	ATM	c.2945G>A	p.Arg982His	11	108142001	NM_000051	G	A	184953	1.65e-05	AFR: 9.666e-05	9.415e-06
	ATM	c.295A>G	p.Ser99Gly	11	108100014	NM_000051	A	G	127364	0.0002	AMR: 0.0008	0.0001977
	ATM	c.3014A>G	p.Asn1005Ser	11	108142070	NM_000051	A	G	127366	0.0003	AMR: 0.0008	0.0002919
	ATM	c.3242A>G	p.Asn1081Ser	11	108143537	NM_000051	A	G	142046	0.0002	SAS: 0.0013	0.0002354
	ATM	c.3505G>A	p.Glu1169Lys	11	108151824	NM_000051	G	A	186729	8.24e-06	NFE: 1.499e-05	9.415e-06
	ATM	c.3694T>C	p.Ser1232Pro	11	108153554	NM_000051	T	C	302299	1.697e-05	AFR: 9.897e-05	1.884e-05
	ATM	c.370A>G	p.Ile124Val	11	108106435	NM_000051	A	G	127373	0.0008	AFR: 0.0076	0.000725
	ATM	c.390T>G	p.Asp130Glu	11	108106455	NM_000051	T	G	NA	0	0	0
	ATM	c.3919G>A	p.Gly1307Arg	11	108155126	NM_000051	G	A	142243	0.0004	SAS: 0.0031	0.0004708
	ATM	c.3925G>A	p.Ala1309Thr	11	108155132	NM_000051	G	A	127377	0.0006	NFE: 0.0009	0.0006026
	ATM	c.4066A>G	p.Asn1356Asp	11	108158399	NM_000051	A	G	127380	0.0001	NFE: 0.0002	0.0001036
	ATM	c.4304A>C	p.Lys1435Thr	11	108160396	NM_000051	A	C	188194	8.428e-06	0	9.416e-06
	ATM	c.4324T>C	p.Tyr1442His	11	108160416	NM_000051	T	C	127385	0.0004	NFE: 0.0007	0.0003766
	ATM	c.4388T>G	p.Phe1463Cys	11	108160480	NM_000051	T	G	127388	0.0014	NFE: 0.0023	0.001318
	ATM	c.4402G>A	p.Val1468Ile	11	108160494	NM_000051	G	A	127389	0.0001	AFR: 0.0009	0.0001036
	ATM	c.4709T>C	p.Val1570Ala	11	108164137	NM_000051	T	C	127394	0.0005	NFE: 0.0008	0.0004803
	ATM	c.4856G>A	p.Arg1619Lys	11	108165733	NM_000051	G	A	181998	2.472e-05	NFE: 4.495e-05	1.883e-05
	ATM	c.4963T>C	p.Ser1655Pro	11	108168067	NM_000051	T	C	302299	0	0	0
	ATM	c.5418A>G	p.Ile1806Met	11	108173678	NM_000051	A	G	NA	1.648e-05	NFE: 2.998e-05	1.883e-05
	ATM	c.5776_5790delACAATTTTTAATGAT	p.1926_1930del	11	108180899	NM_000051	AACAATTTTTAATGAT	A	187366	0	0	0
	ATM	c.5821G>C	p.Val1941Leu	11	108180945	NM_000051	G	C	127412	8.263e-05	NFE: 0.0002	7.533e-05
	ATM	c.5890A>G	p.Lys1964Glu	11	108181014	NM_000051	A	G	142126	0.0001	OTH: 0.0011	0.000113
	ATM	c.5975A>C	p.Lys1992Thr	11	108183194	NM_000051	A	C	127415	0.0004	OTH: 0.0011	0.0003484
	ATM	c.6067G>A	p.Gly2023Arg	11	108186610	NM_000051	G	A	127416	0.0016	NFE: 0.0023	0.001525
	ATM	c.610G>A	p.Gly204Arg	11	108114793	NM_000051	G	A	127419	0.0001	AMR: 0.0003	0.0001224
	ATM	c.6235G>A	p.Val2079Ile	11	108188136	NM_000051	G	A	133629	0.0026	AFR: 0.0180	0.002542
	ATM	c.6437G>C	p.Ser2146Thr	11	108190770	NM_000051	G	C	133630	0.0013	AFR: 0.0129	0.00129
	ATM	c.68G>A	p.Arg23Gln	11	108098419	NM_000051	G	A	127429	0	0	0
	ATM	c.6919C>T	p.Leu2307Phe	11	108196896	NM_000051	C	T	127430	0.0011	NFE: 0.0019	0.0009133
	ATM	c.7166C>T	p.Ser2389Leu	11	108199824	NM_000051	C	T	302299	0	0	0
	ATM	c.735C>T	p.Val245Val	11	108115587	NM_000051	C	T	183707	0.0116	FIN: 0.0416	0.012
	ATM	c.7475T>G	p.Leu2492Arg	11	108201108	NM_000051	T	G	127446	5.77e-05	NFE: 0.0001	3.766e-05
	ATM	c.7740A>C	p.Arg2580Ser	11	108202716	NM_000051	A	C	127448	4.13e-05	AMR: 0.0002	3.766e-05
	ATM	c.787C>T	p.Leu263Phe	11	108115639	NM_000051	C	T	232065	0	0	0
	ATM	c.7919C>T	p.Thr2640Ile	11	108203619	NM_000051	C	T	133634	7.479e-05	NFE: 0.0001	7.532e-05
	ATM	c.7930G>A	p.Gly2644Ser	11	108204615	NM_000051	G	A	234050	0	0	0
	ATM	c.8921C>T	p.Pro2974Leu	11	108235879	NM_000051	C	T	135787	9.886e-05	EAS: 0.0008	0.0001036
	ATM	c.8968G>A	p.Glu2990Lys	11	108235926	NM_000051	G	A	127466	4.942e-05	OTH: 0.0011	3.766e-05
	BAP1	c.1214_1225delAGGAGGATGACG	p.Glu405_D408del	3	52438493	NM_004656	ACGTCATCCTCCT	A	346127	0	0	0
	BAP1	c.1216G>A	p.Glu406Lys	3	52438503	NM_004656	C	T	NA	3.312e-05	NFE: 6.026e-05	2.825e-05
	BAP1	c.1268C>A	p.Thr423Lys	3	52437893	NM_004656	G	T	240045	0.0004	AFR: 0.0049	0.0004708
	BAP1	c.1413T>G	p.Ala471Ala	3	52437748	NM_004656	A	C	346118	0.0061	AFR: 0.0668	0.006082
	BAP1	c.1562G>A	p.Ser521Asn	3	52437599	NM_004656	C	T	NA	0	0	0
	BAP1	c.1619G>A	p.Arg540His	3	52437542	NM_004656	C	T	NA	8.252e-06	NFE: 1.502e-05	9.415e-06
	BAP1	c.1715C>T	p.Pro572Leu	3	52437446	NM_004656	G	A	NA	0	0	0
	BAP1	c.1946G>A	p.Cys649Tyr	3	52436832	NM_004656	C	T	240053	9.06e-05	NFE: 0.0001	8.474e-05
	BAP1	c.1983+5G>-		3	52436789	NM_004656	AC	A	NA	0	0	0
	BAP1	c.2057-4G>T		3	52436441	NM_004656	C	A	240055	0.0066	NFE: 0.0116	0.003143
	BAP1	c.501G>A	p.Ala167Ala	3	52441269	NM_004656	C	T	240060	0.0006	OTH: 0.0011	0.0005932
	BAP1	c.589G>A	p.Gly197Arg	3	52440915	NM_004656	C	T	NA	0	0	0
	BARD1	c.1186C>A	p.Pro396Thr	2	215645412	NM_000465	G	T	NA	0	0	0
	BARD1	c.119C>T	p.Ala40Val	2	215674175	NM_000465	G	A	142910	4.775e-05	AMR: 9.318e-05	3.794e-05
	BARD1	c.1568+3A>G		2	215632203	NM_000465	T	C	NA	0	0	0
	BARD1	c.1568T>C	p.Val523Ala	2	215632206	NM_000465	A	G	127716	6.604e-05	NFE: 0.0001	3.766e-05
	BARD1	c.1977A>G	p.Arg659Arg	2	215595159	NM_000465	T	C	127727	0.0018	OTH: 0.0033	0.001591
	BARD1	c.2191C>G	p.Arg731Gly	2	215593543	NM_000465	G	C	127732	0.0006	AFR: 0.0068	0.0005743
	BARD1	c.2282G>A	p.Ser761Asn	2	215593452	NM_000465	C	T	127735	0.0017	FIN: 0.0098	0.001817
	BARD1	c.2299G>T	p.Val767Leu	2	215593435	NM_000465	C	A	NA	0	0	0
	BARD1	c.33G>T	p.Gln11His	2	215674261	NM_000465	C	A	127737	0.0030	FIN: 0.0117	0.001619
	BARD1	c.346C>T	p.His116Tyr	2	215657039	NM_000465	G	A	142156	0.0004	FIN: 0.0024	0.0004144
	BARD1	c.425C>T	p.Ser142Leu	2	215646173	NM_000465	G	A	NA	0	0	0
	BARD1	c.503C>T	p.Ala168Val	2	215646095	NM_000465	G	A	NA	0	0	0
	BARD1	c.59C>T	p.Pro20Leu	2	215674235	NM_000465	G	A	237841	9.659e-05	SAS: 0.0005	9.541e-05
	BARD1	c.620A>G	p.Lys207Arg	2	215645978	NM_000465	T	C	127741	0.0008	AFR: 0.0079	0.000791
	BARD1	c.668A>G	p.Glu223Gly	2	215645930	NM_000465	T	C	127743	0.0001	NFE: 0.0002	0.0001601
	BARD1	c.773T>C	p.Ile258Thr	2	215645825	NM_000465	A	G	140875	0.0007	SAS: 0.0058	0.0008006
	BARD1	c.946T>G	p.Leu316Val	2	215645652	NM_000465	A	C	142233	1.651e-05	AFR: 0.0002	1.883e-05
	BLM	c.1064C>G	p.Pro355Arg	15	91298145	NM_000057	C	G	317415	0	0	0
	BLM	c.11T>C	p.Val4Ala	15	91290633	NM_000057	T	C	127473	0.0017	NFE: 0.0032	0.001168
	BLM	c.1315A>G	p.Met439Val	15	91303918	NM_000057	A	G	127475	0.0002	NFE: 0.0004	0.0002354
	BLM	c.1481C>T	p.Thr494Ile	15	91304084	NM_000057	C	T	NA	0	0	0
	BLM	c.1864T>C	p.Ser622Pro	15	91304467	NM_000057	T	C	NA	0	0	0
	BLM	c.1883-19A>C		15	91306177	NM_000057	A	C	317415	0.00023	NFE: 0.00046	0.0001977
	BLM	c.1928G>A	p.Arg643His	15	91306241	NM_000057	G	A	127480	0.0032	OTH: 0.0044	0.003069
	BLM	c.2160C>T	p.Ile720Ile	15	91308611	NM_000057	C	T	136513	0.0009	AFR: 0.0096	0.0009415
	BLM	c.2263A>G	p.Lys755Glu	15	91310209	NM_000057	A	G	133697	0.0003	AFR: 0.0040	0.0003108
	BLM	c.2480T>C	p.Met827Thr	15	91312741	NM_000057	T	C	NA	8.241e-06	0	0
	BLM	c.254G>C	p.Arg85Thr	15	91292752	NM_000057	G	C	127488	0.0006	AFR: 0.0059	0.0005649
	BLM	c.2619G>C	p.Lys873Asn	15	91326115	NM_000057	G	C	NA	9.161e-05	OTH: 0.0011	8.474e-05
	BLM	c.2638G>C	p.Glu880Gln	15	91326134	NM_000057	G	C	127489	2.518e-05	NFE: 4.591e-05	2.825e-05
	BLM	c.3041A>G	p.His1014Arg	15	91337418	NM_000057	A	G	236810	0.0003	OTH: 0.0011	0.0003578
	BLM	c.3592G>A	p.Val1198Met	15	91347430	NM_000057	G	A	127500	0.0003	AFR: 0.0029	0.0002448
	BLM	c.3751G>C	p.Glu1251Gln	15	91347589	NM_000057	G	C	127504	1.659e-05	NFE: 3.018e-05	1.883e-05
	BLM	c.385_387delAAG	p.Lys129del	15	91292882	NM_000057	AAAG	A	133706	0.0003	SAS: 0.0022	0.000339
	BLM	c.4076+4T>G		15	91354640	NM_000057	T	G	317415	0.0038	OTH: 0.0066	0.003634
	BLM	c.727A>G	p.Ile243Val	15	91293225	NM_000057	A	G	236826	8.304e-06	NFE: 1.509e-05	0
	BLM	c.805A>G	p.Ser269Gly	15	91295022	NM_000057	A	G	NA	8.28e-06	NFE: 1.506e-05	9.416e-06
	BLM	c.842A>C	p.His281Pro	15	91295059	NM_000057	A	C	127517	9.072e-05	NFE: 0.0002	9.416e-05
	BLM	c.865A>G	p.Ile289Val	15	91295082	NM_000057	A	G	NA	0	0	0
	BLM	c.968A>G	p.Lys323Arg	15	91298049	NM_000057	A	G	127518	0.0003	NFE: 0.0005	0.000226
	BMPR1A	c.1140C>T	p.Asp380Asp	10	88679200	NM_004329	C	T	132691	0.0154	NFE: 0.0218	0.015
	BMPR1A	c.1243G>A	p.Glu415Lys	10	88681353	NM_004329	G	A	41779	0.0007	OTH: 0.0011	0.0006873
	BMPR1A	c.1327C>T	p.Arg443Cys	10	88681437	NM_004329	C	T	133717	0.0006	OTH: 0.0033	0.0005367
	BMPR1A	c.1433G>A	p.Arg478His	10	88683223	NM_004329	G	A	41780	0.0001	NFE: 0.0002	0.000113
	BMPR1A	c.169C>T	p.Pro57Ser	10	88649920	NM_004329	C	T	NA	0	0	0
	BMPR1A	c.478A>G	p.Met160Val	10	88659831	NM_004329	A	G	141022	9.069e-05	SAS: 0.0002	0.0001036
	BRCA1	c.1036C>T	p.Pro346Ser	17	41246512	NM_007294	G	A	37389	0.0002	EAS: 0.0030	0.0002448
	BRCA1	c.1459G>T	p.Val487Phe	17	41246089	NM_007294	C	A	37414	4.119e-05	AFR: 0.0005	4.708e-05
	BRCA1	c.1561G>A	p.Ala521Thr	17	41245987	NM_007294	C	T	54291	4.965e-05	AFR: 0.0006	4.708e-05
	BRCA1	c.1974G>C	p.Met658Ile	17	41245574	NM_007294	C	G	54425	5.769e-05	NFE: 0.0001	5.649e-05
	BRCA1	c.1980C>A	p.Val660Val	17	41245568	NM_007294	G	T	NA	0	0	0
	BRCA1	c.2733A>G	p.Gly911Gly	17	41244815	NM_007294	T	C	54664	0.0008	OTH: 0.0022	0.0008097
	BRCA1	c.3047A>G	p.Asn1016Ser	17	41244501	NM_007294	T	C	NA	0	0	0
	BRCA1	c.3119G>A	p.Ser1040Asn	17	41244429	NM_007294	C	T	17670	0.0132	NFE: 0.0191	0.012
	BRCA1	c.3428C>T	p.Ser1143Phe	17	41244120	NM_007294	G	A	54880	0	0	0
	BRCA1	c.3691T>C	p.Phe1231Leu	17	41243857	NM_007294	A	G	37541	3.295e-05	AFR: 0.0004	3.766e-05
	BRCA1	c.3713C>G	p.Pro1238Arg	17	41243835	NM_007294	G	C	54974	0	0	0
	BRCA1	c.3878C>T	p.Ala1293Val	17	41243670	NM_007294	G	A	55036	1.647e-05	NFE: 2.997e-05	1.883e-05
	BRCA1	c.3995G>T	p.Gly1332Val	17	41243553	NM_007294	C	A	182156	8.238e-06	SAS: 6.057e-05	9.415e-06
	BRCA1	c.4115G>A	p.Cys1372Tyr	17	41243031	NM_007294	C	T	55105	0	0	0
	BRCA1	c.4213A>G	p.Ile1405Val	17	41234565	NM_007294	T	C	37575	4.12e-05	SAS: 0.0002	3.766e-05
	BRCA1	c.4846G>A	p.Ala1616Thr	17	41223085	NM_007294	C	T	369328	0	0	0
	BRCA1	c.5048A>G	p.Glu1683Gly	17	41219651	NM_007294	T	C	NA	0	0	0
	BRCA1	c.5348T>C	p.Met1783Thr	17	41201196	NM_007294	A	G	37659	0.0002	AFR: 0.0019	0.0001412
	BRCA1	c.944G>A	p.Arg315Lys	17	41246604	NM_007294	C	T	NA	0	0	0
	BRCA2	c.10238C>G	p.Thr3413Arg	13	32972888	NM_000059	C	G	182276	0	0	0
	BRCA2	c.1124C>T	p.Pro375Leu	13	32906739	NM_000059	C	T	51067	0	0	0
	BRCA2	c.1514T>C	p.Ile505Thr	13	32907129	NM_000059	T	C	41542	0.0007	OTH: 0.0022	0.0006968
	BRCA2	c.1645A>G	p.Lys549Glu	13	32907260	NM_000059	A	G	NA	0	0	0
	BRCA2	c.175C>G	p.Pro59Ala	13	32893321	NM_000059	C	G	51185	0.0002	AFR: 0.0027	0.0002166
	BRCA2	c.1792A>G	p.Thr598Ala	13	32907407	NM_000059	A	G	41543	0.0023	FIN: 0.0080	0.002392
	BRCA2	c.1798T>C	p.Tyr600His	13	32907413	NM_000059	T	C	51197	0.0005	AFR: 0.0058	0.0005086
	BRCA2	c.2138A>T	p.Gln713Leu	13	32910630	NM_000059	A	T	51249	0.0005	AFR: 0.0059	0.0005179
	BRCA2	c.215A>G	p.Asn72Ser	13	32893361	NM_000059	A	G	51251	2.475e-05	EAS: 0.0003	2.825e-05
	BRCA2	c.233C>T	p.Pro78Leu	13	32893379	NM_000059	C	T	NA	0	0	0
	BRCA2	c.2519T>C	p.Met840Thr	13	32911011	NM_000059	T	C	318562	8.29e-06	EAS: 0.0001	0
	BRCA2	c.2705C>T	p.Ala902Val	13	32911197	NM_000059	C	T	NA	0	0	0
	BRCA2	c.2813C>A	p.Ala938Glu	13	32911305	NM_000059	C	A	51353	3.313e-05	AFR: 0.0004	3.766e-05
	BRCA2	c.2875G>A	p.Val959Ile	13	32911367	NM_000059	G	A	NA	0	0	0
	BRCA2	c.291_296delATTAGA	p.Glu97_L98del	13	32893433	NM_000059	AAGAATT	A	51371	0	0	0
	BRCA2	c.2926_2927delinsAT	p.Ser976Ile	13	32911418	NM_000059	TC	AT	51372	0.0007	AFR: 0.0085	0
	BRCA2	c.2927C>T	p.Ser976Phe	13	32911419	NM_000059	C	T	NA	0.0007	AFR: 0.0085	0.0008193
	BRCA2	c.2944A>C	p.Ile982Leu	13	32911436	NM_000059	A	C	51375	4.155e-05	NFE: 7.548e-05	1.883e-05
	BRCA2	c.4412_4414delGAA	p.Arg1471del	13	32912901	NM_000059	TAAG	T	265056	0	0	0
	BRCA2	c.4811T>C	p.Leu1604Pro	13	32913303	NM_000059	T	C	318562	0	0	0
	BRCA2	c.5396C>T	p.Ala1799Val	13	32913888	NM_000059	C	T	220028	8.264e-06	NFE: 1.504e-05	9.415e-06
	BRCA2	c.5744C>T	p.Thr1915Met	13	32914236	NM_000059	C	T	41556	0.0179	NFE: 0.0272	0.017
	BRCA2	c.6209A>G	p.Glu2070Gly	13	32914701	NM_000059	A	G	318562	0	0	0
	BRCA2	c.6290C>T	p.Thr2097Met	13	32914782	NM_000059	C	T	38032	0.0001	AMR: 0.0004	0.0001318
	BRCA2	c.6322C>T	p.Arg2108Cys	13	32914814	NM_000059	C	T	41559	0.0006	EAS: 0.0058	0.0006027
	BRCA2	c.6773A>G	p.Glu2258Gly	13	32915265	NM_000059	A	G	318562	0	0	0
	BRCA2	c.7013C>T	p.Thr2338Ile	13	32929003	NM_000059	C	T	318562	0	0	0
	BRCA2	c.7090G>A	p.Glu2364Lys	13	32929080	NM_000059	G	A	52266	0	0	0
	BRCA2	c.7444A>G	p.Thr2482Ala	13	32930573	NM_000059	A	G	318562	0	0	0
	BRCA2	c.7504C>T	p.Arg2502Cys	13	32930633	NM_000059	C	T	41563	0.0003	AFR: 0.0029	0.0003201
	BRCA2	c.770A>C	p.Asn257Thr	13	32905144	NM_000059	A	C	142281	8.889e-06	NFE: 1.631e-05	9.416e-06
	BRCA2	c.8014A>G	p.Ile2672Val	13	32937353	NM_000059	A	G	38135	8.295e-06	AFR: 9.804e-05	9.415e-06
	BRCA2	c.839A>G	p.Lys280Arg	13	32906454	NM_000059	A	G	NA	0	0	0
	BRCA2	c.898G>A	p.Val300Ile	13	32906513	NM_000059	G	A	236925	0	0	0
	BRCA2	c.9085G>A	p.Ala3029Thr	13	32954018	NM_000059	G	A	52743	5.101e-05	NFE: 9.35e-05	4.708e-05
	BRCA2	c.9242T>C	p.Val3081Ala	13	32954268	NM_000059	T	C	38222	1.657e-05	NFE: 3.016e-05	1.883e-05
	BRCA2	c.9634G>C	p.Gly3212Arg	13	32971167	NM_000059	G	C	38257	0.0005	AFR: 0.0058	0.0005273
	BRCA2	c.9925G>A	p.Glu3309Lys	13	32972575	NM_000059	G	A	52918	4.948e-05	AFR: 0.0006	4.708e-05
	BRCA2	c.9952A>C	p.Asn3318His	13	32972602	NM_000059	A	C	52926	0	0	0
	BRIP1	c.1018C>T	p.Leu340Phe	17	59878736	NM_032043	G	A	NA	1.648e-05	EAS: 0.0002	9.415e-06
	BRIP1	c.139C>G	p.Pro47Ala	17	59937223	NM_032043	G	C	4736	0.0002	NFE: 0.0004	0.0002448
	BRIP1	c.1444A>G	p.Ile482Val	17	59870987	NM_032043	T	C	128160	3.4e-05	NFE: 6.577e-05	2.825e-05
	BRIP1	c.1686T>G	p.Ile562Met	17	59858309	NM_032043	A	C	NA	0	0	0
	BRIP1	c.2220G>T	p.Gln740His	17	59821830	NM_032043	C	A	133752	0.0005	AMR: 0.0012	0.0004425
	BRIP1	c.2233G>A	p.Ala745Thr	17	59821817	NM_032043	C	T	128169	6.591e-05	AMR: 0.0002	7.532e-05
	BRIP1	c.2428C>G	p.Leu810Val	17	59793376	NM_032043	G	C	128172	0	0	0
	BRIP1	c.2706A>G	p.Ile902Met	17	59763396	NM_032043	T	C	128179	2.471e-05	OTH: 0.0011	2.825e-05
	BRIP1	c.317G>A	p.Arg106His	17	59934481	NM_032043	C	T	142458	0.0001	AFR: 0.0012	0.0001318
	BRIP1	c.3191T>C	p.Phe1064Ser	17	59761216	NM_032043	A	G	NA	0	0	0
	BRIP1	c.3525dupT	p.Ile1176fs	17	59760881	NM_032043	T	TA	216799	8.28e-06	NFE: 1.505e-05	9.417e-06
	BRIP1	c.3691A>G	p.Ile1231Val	17	59760716	NM_032043	T	C	231673	0	0	0
	BRIP1	c.517C>T	p.Arg173Cys	17	59924572	NM_032043	G	A	133761	0.0027	NFE: 0.0040	0.002533
	BRIP1	c.533C>T	p.Thr178Ile	17	59924556	NM_032043	G	A	230797	0	0	0
	BRIP1	c.577G>A	p.Val193Ile	17	59924512	NM_032043	C	T	128192	0.0040	NFE: 0.0057	0.003973
	BRIP1	c.628C>T	p.Pro210Ser	17	59886118	NM_032043	G	A	141761	4.156e-05	AFR: 0.0005	4.708e-05
	BRIP1	c.890A>G	p.Lys297Arg	17	59885856	NM_032043	T	C	128198	0.0011	NFE: 0.0017	0.001083
	CDH1	c.1008+4delA		16	68845765	NM_004360	CA	C	221523	8.265e-06	NFE: 1.502e-05	9.415e-06
	CDH1	c.1420A>G	p.Thr474Ala	16	68849517	NM_004360	A	G	NA	8.236e-06	NFE: 1.498e-05	9.415e-06
	CDH1	c.1585A>C	p.Thr529Pro	16	68853202	NM_004360	A	C	186165	1.647e-05	0	9.415e-06
	CDH1	c.160A>G	p.Arg54Gly	16	68772311	NM_004360	A	G	140862	5.916e-05	NFE: 0.0002	3.21e-05
	CDH1	c.1774G>A	p.Ala592Thr	16	68855966	NM_004360	G	A	41783	0.0032	OTH: 0.0077	0.002956
	CDH1	c.188G>A	p.Arg63Gln	16	68835597	NM_004360	G	A	127919	5.765e-05	SAS: 0.0001	6.591e-05
	CDH1	c.2033T>C	p.Val678Ala	16	68857398	NM_004360	T	C	231773	0	0	0
	CDH1	c.2104G>A	p.Glu702Lys	16	68857469	NM_004360	G	A	127921	0.0002	AFR: 0.0015	0.000226
	CDH1	c.2179C>T	p.Leu727Phe	16	68862091	NM_004360	C	T	NA	8.237e-06	SAS: 6.056e-05	9.415e-06
	CDH1	c.2227C>T	p.Pro743Ser	16	68862139	NM_004360	C	T	186510	0	0	0
	CDH1	c.2329G>A	p.Asp777Asn	16	68863590	NM_004360	G	A	127922	0.0001	NFE: 0.0002	0.000113
	CDH1	c.2399G>A	p.Arg800His	16	68863660	NM_004360	G	A	142363	1.657e-05	0	1.883e-05
	CDH1	c.2413G>A	p.Asp805Asn	16	68863674	NM_004360	G	A	127925	0.0002	NFE: 0.0004	0.0001789
	CDH1	c.2638G>A	p.Glu880Lys	16	68867391	NM_004360	G	A	184838	0.0001	EAS: 0.0013	0.0001412
	CDH1	c.28G>A	p.Ala10Thr	16	68771346	NM_004360	G	A	NA	0	0	0
	CDH1	c.371G>A	p.Arg124His	16	68835780	NM_004360	G	A	141538	3.318e-05	AFR: 0.0002	2.825e-05
	CDH1	c.820G>A	p.Gly274Ser	16	68844232	NM_004360	G	A	186326	0.0001	SAS: 0.0008	0.0001318
	CDH1	c.88C>A	p.Pro30Thr	16	68772239	NM_004360	C	A	127933	0.0009	NFE: 0.0021	0.0003888
	CDH1	c.892G>A	p.Ala298Thr	16	68845646	NM_004360	G	A	41787	0.0005	SAS: 0.0015	0.0005273
	CDK4	c.132_134delAGG	p.Gly44del	12	58145366	NM_000075	ACCT	A	231912	1.648e-05	SAS: 6.057e-05	1.883e-05
	CDK4	c.331G>A	p.Gly111Ser	12	58145013	NM_000075	C	T	NA	0	0	0
	CDK4	c.409G>C	p.Val137Leu	12	58144819	NM_000075	C	G	220499	8.237e-06	AFR: 9.615e-05	9.415e-06
	CDK4	c.460G>C	p.Val154Leu	12	58144768	NM_000075	C	G	216270	3.295e-05	NFE: 5.994e-05	3.766e-05
	CDK4	c.743C>G	p.Ala248Gly	12	58143041	NM_000075	G	C	NA	0	0	0
	CDK4	c.838C>T	p.Pro280Ser	12	58142382	NM_000075	G	A	NA	0	0	0
	CDK4	c.898G>A	p.Gly300Ser	12	58142322	NM_000075	C	T	246400	0	0	0
	CDKN2Ap16INK4A	c.170C>A	p.Ala57Asp	9	21971188	NM_000077	G	T	195151	1.193e-05	0	9.504e-06
	CDKN2Ap16INK4A	c.301G>C	p.Gly101Arg	9	21971057	NM_000077	C	G	283869	1.802e-05	SAS: 6.163e-05	1.899e-05
	CDKN2Ap16INK4A	c.369T>A	p.His123Gln	9	21970989	NM_000077	A	T	127526	0.0003	AFR: 0.0041	0.0003392
	CDKN2Ap16INK4A	c.370C>T	p.Arg124Cys	9	21970988	NM_000077	G	A	260986	0.0001	SAS: 0.0008	0.0001507
	CDKN2Ap16INK4A	c.373G>C	p.Asp125His	9	21970985	NM_000077	C	G	41577	5.993e-05	NFE: 0.0001	2.826e-05
	CDKN2Ap16INK4A	c.384G>A	p.Arg128Arg	9	21970974	NM_000077	C	T	363050	7.67e-05	AMR: 0.0002	6.592e-05
	CDKN2Ap16INK4A	c.442G>A	p.Ala148Thr	9	21970916	NM_000077	C	T	354704	0.0228	NFE: 0.0352	0.022
	CHEK2	c.1091T>C	p.Ile364Thr	22	29092893	NM_007194	A	G	185975	3.333e-05	FIN: 0.0002	3.766e-05
	CHEK2	c.1312G>T	p.Asp438Tyr	22	29091178	NM_007194	C	A	128056	0.0003	OTH: 0.0011	0.0002448
	CHEK2	c.1336A>G	p.Asn446Asp	22	29091154	NM_007194	T	C	126909	5.788e-05	SAS: 0.0004	6.591e-05
	CHEK2	c.1597A>G	p.Thr533Ala	22	29083920	NM_007194	T	C	142032	0.0001	EAS: 0.0016	9.773e-05
	CHEK2	c.254C>T	p.Pro85Leu	22	29130456	NM_007194	G	A	5594	0.0009	AFR: 0.0074	0.0008383
	CHEK2	c.320-5T>A		22	29121360	NM_007194	A	T	128070	0.0005	OTH: 0.0011	0.0004614
	CHEK2	c.328A>G	p.Asn110Asp	22	29121347	NM_007194	T	C	240745	0	0	0
	CHEK2	c.354C>G	p.Asp118Glu	22	29121321	NM_007194	G	C	233065	0	0	0
	CHEK2	c.422A>C	p.Lys141Thr	22	29121253	NM_007194	T	G	186751	0	0	0
	CHEK2	c.538C>T	p.Arg180Cys	22	29121019	NM_007194	G	A	128081	0.0014	EAS: 0.0040	0.001469
	CHEK2	c.541C>T	p.Arg181Cys	22	29121016	NM_007194	G	A	5597	9.889e-05	SAS: 0.0005	0.000113
	CHEK2	c.544C>A	p.Pro182Thr	22	29121013	NM_007194	G	T	187752	0	0	0
	CHEK2	c.556A>C	p.Asn186His	22	29121001	NM_007194	T	G	141977	6.593e-05	AFR: 0.0002	7.533e-05
	CHEK2	c.7C>T	p.Arg3Trp	22	29130703	NM_007194	G	A	142209	0.0002	SAS: 0.0005	0.0002542
	DICER1	c.1124C>G	p.Pro375Arg	14	95590785	NM_030621	G	C	242032	0.0004	AMR: 0.0005	0.0003578
	DICER1	c.1825G>T	p.Asp609Tyr	14	95582086	NM_030621	C	A	133965	0.0006	AFR: 0.0066	0.0006214
	DICER1	c.1935G>A	p.Pro645Pro	14	95579534	NM_030621	C	T	221180	0.0095	FIN: 0.0237	0.009236
	DICER1	c.20A>G	p.Gln7Arg	14	95599776	NM_030621	T	C	133962	0.0018	OTH: 0.0025	0.001573
	DICER1	c.2118C>T	p.Gly706Gly	14	95577792	NM_030621	G	A	242058	2.471e-05	SAS: 6.057e-05	9.415e-06
	DICER1	c.2557A>G	p.Ile853Val	14	95574310	NM_030621	T	C	133966	0.0008	AFR: 0.0089	0.0007626
	DICER1	c.2614G>A	p.Ala872Thr	14	95574253	NM_030621	C	T	133967	0.0008	OTH: 0.0022	0.0008285
	DICER1	c.2653A>G	p.Asn885Asp	14	95574096	NM_030621	T	C	315119	0	0	0
	DICER1	c.2717G>A	p.Arg906His	14	95574032	NM_030621	C	T	242069	0	0	0
	DICER1	c.3479C>A	p.Ser1160Tyr	14	95570254	NM_030621	G	T	242085	4.946e-05	EAS: 0.0007	4.708e-05
	DICER1	c.4050+8A>G		14	95569675	NM_030621	T	C	NA	9.186e-05	AMR: 0.0003	8.476e-05
	DICER1	c.4616C>T	p.Thr1539Met	14	95562641	NM_030621	G	A	242114	1.647e-05	AFR: 9.61e-05	9.415e-06
	DICER1	c.4891T>G	p.Ser1631Ala	14	95562366	NM_030621	A	C	221072	0.0022	NFE: 0.0038	0.002203
	DICER1	c.5038A>G	p.Lys1680Glu	14	95562219	NM_030621	T	C	NA	0	0	0
	DICER1	c.5259C>G	p.Asp1753Glu	14	95560330	NM_030621	G	C	315119	0	0	0
	DICER1	c.59C>T	p.Ala20Val	14	95599737	NM_030621	G	A	133964	0.0005	OTH: 0.0011	0.0004896
	EGFR	c.119A>G	p.Gln40Arg	7	55210009	NM_005228	A	G	NA	0	0	0
	EGFR	c.1298+4A>G		7	55225450	NM_005228	A	G	NA	0	0	0
	EGFR	c.1509C>T	p.Gly503Gly	7	55229202	NM_005228	C	T	NA	0.0074	FIN: 0.0147	0.007005
	EGFR	c.1557G>T	p.Glu519Asp	7	55229250	NM_005228	G	T	NA	3.296e-05	AFR: 0.0004	3.766e-05
	EGFR	c.2024G>A	p.Arg675Gln	7	55240780	NM_005228	G	A	134025	0.0002	NFE: 0.0003	0.0001883
	EGFR	c.2175G>A	p.Thr725Thr	7	55241727	NM_005228	G	A	NA	0.0003	EAS: 0.0038	0.000339
	EGFR	c.2289C>G	p.Ala763Ala	7	55248991	NM_005228	C	G	45249	0.0004	NFE: 0.0006	0.0003201
	EGFR	c.2543C>T	p.Pro848Leu	7	55259485	NM_005228	C	T	45282	0.0005	NFE: 0.0008	0.0004708
	EGFR	c.2710G>A	p.Val904Ile	7	55266418	NM_005228	G	A	NA	0.0004	SAS: 0.0024	0.0004049
	EGFR	c.2782G>C	p.Glu928Gln	7	55266490	NM_005228	G	C	NA	0	0	0
	EGFR	c.2996G>A	p.Arg999His	7	55268930	NM_005228	G	A	NA	9.885e-05	OTH: 0.0011	9.415e-05
	EGFR	c.3485G>A	p.Ser1162Asn	7	55273162	NM_005228	G	A	134031	0.0009	AFR: 0.0097	0.0007909
	EGFR	c.3629C>T	p.Ala1210Val	7	55273306	NM_005228	C	T	NA	0.0003	AMR: 0.0006	0.000339
	EGFR	c.844G>A	p.Glu282Lys	7	55221800	NM_005228	G	A	NA	0.0003	OTH: 0.0011	0.0003107
	EGFR	c.968T>C	p.Val323Ala	7	55223601	NM_005228	T	C	NA	6.748e-05	AFR: 0.0007	6.591e-05
	EGFR	c.971G>A	p.Arg324His	7	55223604	NM_005228	G	A	NA	8.48e-06	NFE: 1.547e-05	9.415e-06
	EPCAM	c.135A>G	p.Gln45Gln	2	47600660	NM_002354	A	G	215499	0.0011	AFR: 0.0114	0.001092
	EPCAM	c.238A>G	p.Arg80Gly	2	47601000	NM_002354	A	G	NA	8.245e-06	NFE: 1.499e-05	9.415e-06
	EPCAM	c.267G>C	p.Gln89His	2	47601029	NM_002354	G	C	127848	0.0026	NFE: 0.0040	0.002429
	EPCAM	c.338C>T	p.Thr113Ile	2	47601100	NM_002354	C	T	NA	8.238e-06	SAS: 6.056e-05	9.415e-06
	EPCAM	c.345G>A	p.Met115Ile	2	47601107	NM_002354	G	A	NA	0.0010	AFR: 0.0102	0.0009415
	EPCAM	c.487C>T	p.Arg163Trp	2	47602434	NM_002354	C	T	136023	0.0003	AFR: 0.0030	0.000339
	EPCAM	c.583C>G	p.Leu195Val	2	47606119	NM_002354	C	G	239134	1.653e-05	AMR: 8.648e-05	1.883e-05
	EPCAM	c.5C>T	p.Ala2Val	2	47596649	NM_002354	C	T	127850	0.0061	NFE: 0.0149	0.001458
	EPCAM	c.655G>A	p.Asp219Asn	2	47606191	NM_002354	G	A	NA	8.28e-06	NFE: 1.507e-05	9.417e-06
	EPCAM	c.77-11T>A		2	47600591	NM_002354	T	A	137214	0.0101	NFE: 0.0134	0.007826
	EPCAM	c.831A>G	p.Ile277Met	2	47607081	NM_002354	A	G	127851	0.0023	SAS: 0.0032	0.002081
	FAM175A	c.1217C>T	p.Ser406Phe	4	84383635	NM_139076	G	A	NA	0	0	0
	FAM175A	c.125A>G	p.Lys42Arg	4	84403360	NM_139076	T	C	128218	0.0002	OTH: 0.0011	0.0001894
	FAM175A	c.21G>A	p.Ser7Ser	4	84406205	NM_139076	C	T	NA	0.0085	AMR: 0.0706	0.008806
	FAM175A	c.272A>T	p.Asn91Ile	4	84393385	NM_139076	T	A	NA	3.88e-05	AMR: 0.0013	1.033e-05
	FAM175A	c.364C>G	p.Gln122Glu	4	84391468	NM_139076	G	C	128220	0.0005	AFR: 0.0053	0.0004519
	FAM175A	c.422C>T	p.Thr141Ile	4	84391410	NM_139076	G	A	128222	0.0038	NFE: 0.0055	0
	FAM175A	c.476+18A>T		4	84391338	NM_139076	T	A	NA	0.0011	NFE: 0.0023	0.001073
	FAM175A	c.755G>A	p.Arg252Gln	4	84384688	NM_139076	C	T	128225	0.0007	NFE: 0.0012	0.0006591
	FAM175A	c.817G>C	p.Asp273His	4	84384035	NM_139076	C	G	NA	0	0	0
	FAM175A	c.897G>A	p.Met299Ile	4	84383955	NM_139076	C	T	NA	0.0004	AFR: 0.0036	0.0004049
	FH	c.1049G>A	p.Arg350Gln	1	241667401	NM_000143	C	T	NA	4.954e-05	SAS: 0.0001	4.708e-05
	FH	c.122C>T	p.Ala41Val	1	241682901	NM_000143	G	A	184518	0.0010	NFE: 0.0033	0.0004566
	FH	c.143A>T	p.Asn48Ile	1	241680606	NM_000143	T	A	NA	0	0	0
	FH	c.305C>T	p.Ala102Val	1	241676976	NM_000143	G	A	185591	6.592e-05	NFE: 0.0001	6.591e-05
	FH	c.346A>T	p.Ile116Phe	1	241676935	NM_000143	T	A	41582	2.471e-05	NFE: 4.495e-05	1.883e-05
	FH	c.580G>A	p.Ala194Thr	1	241672061	NM_000143	C	T	142075	8.277e-05	SAS: 0.0001	5.65e-05
	FH	c.883G>A	p.Ala295Thr	1	241669324	NM_000143	C	T	41583	3.298e-05	AFR: 0.0004	3.766e-05
	FH	c.914T>C	p.Phe305Ser	1	241667536	NM_000143	A	G	NA	0	0	0
	FH	c.986A>G	p.Asn329Ser	1	241667464	NM_000143	T	C	NA	1.649e-05	NFE: 2.998e-05	1.883e-05
	FLCN	c.1202G>A	p.Arg401His	17	17119792	NM_144997	C	T	NA	9.337e-05	SAS: 0.0007	0.0001036
	FLCN	c.1247A>G	p.Asn416Ser	17	17119747	NM_144997	T	C	NA	1.695e-05	NFE: 3.078e-05	1.883e-05
	FLCN	c.1333G>A	p.Ala445Thr	17	17118598	NM_144997	C	T	3370	0.0027	NFE: 0.0037	0.00274
	FLCN	c.1334C>T	p.Ala445Val	17	17118597	NM_144997	G	A	NA	0	0	0
	FLCN	c.1387T>C	p.Tyr463His	17	17118544	NM_144997	A	G	NA	3.298e-05	AMR: 8.646e-05	3.766e-05
	FLCN	c.1414C>G	p.Pro472Ala	17	17118517	NM_144997	G	C	241918	0.0003	AFR: 0.0028	0.0002448
	FLCN	c.1539-16_1539-12delTTTTG		17	17117181		CCAAAA	C	96479	1.65e-05	SAS: 6.057e-05	0
	FLCN	c.1704G>A	p.Thr568Thr	17	17117005	NM_144997	C	T	NA	7.413e-05	AMR: 0.0004319	6.591e-05
	FLCN	c.247G>A	p.Glu83Lys	17	17131205	NM_144997	C	T	NA	8.245e-06	EAS: 0.0001	9.415e-06
	FLCN	c.278C>T	p.Pro93Leu	17	17129608	NM_144997	G	A	NA	2.472e-05	EAS: 0.0003	2.825e-05
	FLCN	c.424T>A	p.Phe142Ile	17	17127430	NM_144997	A	T	NA	0	0	0
	FLCN	c.552C>A	p.Asn184Lys	17	17127302	NM_144997	G	T	241926	3.34e-05	NFE: 6.101e-05	1.883e-05
	FLCN	c.580C>T	p.Arg194Trp	17	17127274	NM_144997	G	A	141552	0.0002	NFE: 0.0003	0.0002071
	FLCN	c.715C>T	p.Arg239Cys	17	17125879	NM_144997	G	A	134427	0.0002	OTH: 0.0022	0.000226
	FLCN	c.802C>T	p.Arg268Trp	17	17124920	NM_144997	G	A	NA	6.873e-05	SAS: 0.0002	7.533e-05
	FLCN	c.959G>A	p.Arg320Gln	17	17122436	NM_144997	C	T	41863	0.0008	NFE: 0.0013	0.0007532
	GATA2	c.1024G>A	p.Ala342Thr	3	128200781	NM_032638	C	T	NA	0	SAS: 0	0
	GATA2	c.142T>A	p.Phe48Ile	3	128205733	NM_032638	A	T	241720	0	0	0
	GATA2	c.230-12_230-9delCTTT		3	128205219	NM_032638	CAAAG	C	343148	0.0004	NFE: 0.0006	0.0002746
	GATA2	c.292C>A	p.Leu98Met	3	128205149	NM_032638	G	T	NA	0	0	0
	GATA2	c.481C>G	p.Pro161Ala	3	128204960	NM_032638	G	C	134465	0.0096	NFE: 0.0154	0.007903
	GREM1	c.463A>G	p.Thr155Ala	15	33023354	NM_013372	A	G	NA	3.297e-05	AMR: 8.637e-05	2.825e-05
	GREM1	c.77A>G	p.Lys26Arg	15	33022968	NM_013372	A	G	NA	4.408e-05	NFE: 7.975e-05	2.827e-05
	HRAS	c.477G>A	p.Leu159Leu	11	532729	NM_001130442	C	T	40446	0.0014	NFE: 0.0021	0.001318
	HRAS	c.482G>A	p.Arg161His	11	532724	NM_001130442	C	T	NA	1.674e-05	EAS: 0.0001	9.415e-06
	HRAS	c.506G>A	p.Arg169Gln	11	532700	NM_001130442	C	T	180856	2.517e-05	AFR: 9.831e-05	2.825e-05
	HRAS	c.508A>T	p.Lys170*	11	532698	NM_001130442	T	A	40447	3.356e-05	NFE: 6.141e-05	1.883e-05
	JAK2	c.1171G>C	p.Ala391Pro	9	5064997	NM_004972	G	C	NA	1.656e-05	NFE: 3.013e-05	1.883e-05
	JAK2	c.1174G>A	p.Val392Met	9	5065000	NM_004972	G	A	134564	0.0005	EAS: 0.0070	0.0004896
	JAK2	c.1177C>G	p.Leu393Val	9	5065003	NM_004972	C	G	134563	0.0073	AFR: 0.0288	0.007231
	JAK2	c.1711G>A	p.Gly571Ser	9	5072561	NM_004972	G	A	NA	0.0005	OTH: 0.0011	0.0004143
	JAK2	c.1768T>C	p.Tyr590His	9	5072618	NM_004972	T	C	NA	0	0	0
	JAK2	c.176C>T	p.Ser59Phe	9	5022163	NM_004972	C	T	NA	3.295e-05	EAS: 0.0003	3.766e-05
	JAK2	c.2114C>A	p.Thr705Lys	9	5078427	NM_004972	C	A	NA	8.254e-06	NFE: 1.501e-05	9.415e-06
	JAK2	c.2538G>C	p.Glu846Asp	9	5081828	NM_004972	G	C	134553	0.0005	FIN: 0.0012	0.0004519
	JAK2	c.2762-10_2762-9delAT		9	5090434	NM_004972	TTA	T	367131	0.0006	SAS: 0.0060	0.0006688
	JAK2	c.2762-11_2762-10delTA		9	5090434	NM_004972	TTA	T	367160	0.0006	SAS: 0.0060	0.0006688
	JAK2	c.2767C>T	p.Arg923Cys	9	5090451	NM_004972	C	T	NA	2.616e-05	EAS: 0.0001	2.825e-05
	JAK2	c.2886+19delA		9	5090588	NM_004972	TA	T	NA	0	0	0
	JAK2	c.3062A>T	p.Tyr1021Phe	9	5123006	NM_004972	A	T	367160	6.641e-05	NFE: 0.0001	7.535e-05
	JAK2	c.3188G>A	p.Arg1063His	9	5126343	NM_004972	G	A	134555	0.0044	FIN: 0.0096	0.003974
	JAK2	c.3288T>A	p.Asp1096Glu	9	5126443	NM_004972	T	A	134556	0.0012	AFR: 0.0139	0.001196
	JAK2	c.3291+6A>C		9	5126452	NM_004972	A	C	NA	0.0003	NFE: 0.0006	0.0003014
	JAK2	c.3323A>G	p.Asn1108Ser	9	5126715	NM_004972	A	G	134557	0.0019	OTH: 0.0034	0.001742
	JAK2	c.337C>G	p.Leu113Val	9	5029893	NM_004972	C	G	367121	0.0006	NFE: 0.0011	0.0006215
	JAK2	c.397C>T	p.Arg133Trp	9	5044449	NM_004972	C	T	NA	1.648e-05	AFR: 9.621e-05	1.883e-05
	JAK2	c.638G>A	p.Cys213Tyr	9	5054586	NM_004972	G	A	NA	0	0	0
	JAK2	c.731A>G	p.Lys244Arg	9	5054679	NM_004972	A	G	NA	0.0003	AFR: 0.0033	0.0002636
	JAK2	c.933A>T	p.Glu311Asp	9	5054881	NM_004972	A	T	NA	0	0	0
	KIT	c.1036C>G	p.Gln346Glu	4	55573374	NM_000222	C	G	NA	0	0	0
	KIT	c.1120G>A	p.Val374Ile	4	55575594	NM_000222	G	A	237235	0.0006	AFR: 0.0067	0.0006026
	KIT	c.1195G>A	p.Val399Ile	4	55575669	NM_000222	G	A	134629	0.0005	NFE: 0.0007	0.000386
	KIT	c.1199A>G	p.Asn400Ser	4	55575673	NM_000222	A	G	41597	0.0007	AFR: 0.0067	0.0006779
	KIT	c.1444G>T	p.Ala482Ser	4	55592120	NM_000222	G	T	NA	0	0	0
	KIT	c.1588G>A	p.Val530Ile	4	55593431	NM_000222	G	A	134621	0.0006	AFR: 0.0013	0.0004331
	KIT	c.1594G>A	p.Val532Ile	4	55593437	NM_000222	G	A	237248	0.0002	AFR: 0.0005	0.0001412
	KIT	c.1694G>T	p.Gly565Val	4	55593628	NM_000222	G	T	41600	0.0001	NFE: 0.0002	0.000113
	KIT	c.2361T>C	p.Asn787Asn	4	55598164	NM_000222	T	C	134624	0.0007	AFR: 0.0084	0.000725
	KIT	c.2697-3C>T		4	55603338	NM_000222	C	T	348974	0	0	0
	KIT	c.2900C>G	p.Ser967Cys	4	55604692	NM_000222	C	G	NA	0	0	0
	KIT	c.2928C>G	p.Val976Val	4	55604720	NM_000222	C	G	NA	1.65e-05	AFR: 9.628e-05	1.883e-05
	KIT	c.550C>A	p.Leu184Met	4	55564662	NM_000222	C	A	NA	0	0	0
	KIT	c.757-9A>G		4	55569881	NM_000222	A	G	348974	3.402e-05	NFE: 6.183e-05	2.825e-05
	KIT	c.78A>C	p.Gln26His	4	55561688	NM_000222	A	C	NA	8.262e-06	SAS: 6.072e-05	9.415e-06
	KIT	c.821C>T	p.Thr274Met	4	55569954	NM_000222	C	T	41604	0.0005	AMR: 0.0011	0.0004708
	KIT	c.878A>G	p.Asn293Ser	4	55570011	NM_000222	A	G	237285	0.0002	AFR: 0.0013	0.0001789
	KRAS	c.494A>G	p.Gln165Arg	12	25368451	NM_033360	T	C	NA	0	0	0
	KRAS	c.535G>A	p.Gly179Ser	12	25368410	NM_033360	C	T	46540	0.0004	OTH: 0.0011	0.0003202
	MAX	c.155C>T	p.Ser52Leu	14	65560442	NM_002382	G	A	NA	0	0	0
	MAX	c.56A>T	p.Gln19Leu	14	65568271	NM_002382	T	A	NA	7.17e-05	NFE: 0.0001	7.533e-05
	MEN1	c.1138C>G	p.Leu380Val	11	64573169	NM_000244	G	C	NA	0	0	0
	MEN1	c.1431C>T	p.Gly477Gly	11	64572223	NM_000244	G	A	NA	2.779e-05	AMR: 0.0002	2.895e-05
	MEN1	c.1537C>A	p.Gln513Lys	11	64572117	NM_000244	G	T	305320	1.057e-05	NFE: 1.953e-05	9.478e-06
	MEN1	c.1648C>T	p.Pro550Ser	11	64572006	NM_000244	G	A	NA	0	0	0
	MEN1	c.1841G>A	p.Gly614Asp	11	64571813	NM_000244	C	T	NA	0	0	0
	MEN1	c.30G>T	p.Leu10Leu	11	64577552	NM_000244	C	A	136169	0.0007	FIN: 0.0060	0.000474
	MEN1	c.789G>C	p.Gln263His	11	64575033	NM_000244	C	G	41855	1.656e-05	NFE: 3.014e-05	9.415e-06
	MET	c.1039G>A	p.Ala347Thr	7	116340177	NM_000245	G	A	132694	0.0005	NFE: 0.0007	0.0003501
	MET	c.103A>T	p.Met35Leu	7	116339241	NM_000245	A	T	134646	0.0001	AFR: 0.0013	0.000104
	MET	c.1063G>A	p.Glu355Lys	7	116340201	NM_000245	G	A	219769	2.583e-05	AFR: 0.0001	2.839e-05
	MET	c.1076G>A	p.Arg359Gln	7	116340214	NM_000245	G	A	93564	0.0003	NFE: 0.0004	0.0002366
	MET	c.110T>C	p.Val37Ala	7	116339248	NM_000245	T	C	41610	0.0011	SAS: 0.0076	0.00123
	MET	c.143C>G	p.Ala48Gly	7	116339281	NM_000245	C	G	NA	3.315e-05	EAS: 0.0005	3.784e-05
	MET	c.143C>T	p.Ala48Val	7	116339281	NM_000245	C	T	NA	3.315e-05	EAS: 0.0005	3.784e-05
	MET	c.146A>G	p.Glu49Gly	7	116339284	NM_000245	A	G	184359	3.315e-05	AFR: 0.0001	2.838e-05
	MET	c.1669A>G	p.Thr557Ala	7	116381047	NM_000245	A	G	184358	6.625e-05	NFE: 0.0001	6.623e-05
	MET	c.1810C>G	p.Leu604Val	7	116395517	NM_000245	C	G	41620	2.487e-05	NFE: 4.498e-05	2.841e-05
	MET	c.1988C>T	p.Ser663Leu	7	116397714	NM_000245	C	T	60780	1.659e-05	EAS: 0.0001	1.894e-05
	MET	c.2128T>C	p.Tyr710His	7	116398538	NM_000245	T	C	NA	0	0	0
	MET	c.2263A>C	p.Ser755Arg	7	116398673	NM_000245	A	C	NA	0	0	0
	MET	c.2432T>A	p.Leu811Gln	7	116403171	NM_000245	T	A	358730	0	0	0
	MET	c.257C>G	p.Thr86Ser	7	116339395	NM_000245	C	G	NA	0	0	0
	MET	c.2584-8C>T		7	116409691	NM_000245	C	T	358730	0.0001106	NFE: 0.0002001	0.0001519
	MET	c.2662C>T	p.His888Tyr	7	116409777	NM_000245	C	T	NA	0.0005	AFR: 0.0053	0.0004545
	MET	c.2908C>T	p.Arg970Cys	7	116411923	NM_000245	C	T	41623	0.0029	NFE: 0.0045	0.002584
	MET	c.2927A>G	p.His976Arg	7	116411942	NM_000245	A	G	NA	0	0	0
	MET	c.2975C>T	p.Thr992Ile	7	116411990	NM_000245	C	T	41624	0.0079	FIN: 0.0204	0.007299
	MET	c.3157A>G	p.Ile1053Val	7	116415063	NM_000245	A	G	358730	0	0	0
	MET	c.3296A>G	p.Asp1099Gly	7	116417479	NM_000245	A	G	NA	1.657e-05	NFE: 2.998e-05	1.894e-05
	MET	c.4016C>T	p.Ala1339Val	7	116436021	NM_000245	C	T	NA	0	0	0
	MET	c.406G>A	p.Val136Ile	7	116339544	NM_000245	G	A	142059	0.0002	FIN: 0.0005	0.0002175
	MET	c.4090_4092delinsTCA	p.Pro1364Ser	7	116436095	NM_000245	CCG	TCA	358730	8.28e-06	NFE: 1.498e-05	0
	MET	c.4135G>A	p.Val1379Met	7	116436140	NM_000245	G	A	NA	0	0	0
	MET	c.504G>T	p.Glu168Asp	7	116339642	NM_000245	G	T	41627	0.0037	NFE: 0.0059	0.003311
	MET	c.607T>A	p.Ser203Thr	7	116339745	NM_000245	T	A	41628	0.0007	OTH: 0.0045	0.0007005
	MET	c.665C>T	p.Thr222Met	7	116339803	NM_000245	C	T	216514	4.973e-05	AMR: 0.0002	3.786e-05
	MET	c.948A>G	p.Ile316Met	7	116340086	NM_000245	A	G	41629	0.0018	AFR: 0.0179	0.001827
	MET	c.959C>T	p.Ala320Val	7	116340097	NM_000245	C	T	135978	0.0004	AFR: 0.0016	0.0003693
	MET	c.967A>G	p.Ser323Gly	7	116340105	NM_000245	A	G	41630	0.0003	NFE: 0.0006	0.0003219
	MITF	c.1199C>A	p.Ala400Asp	3	70014338	NM_000248	C	A	NA	0	0	0
	MITF	c.1244C>T	p.Thr415Met	3	70014383	NM_000248	C	T	NA	2.488e-05	EAS: 0.0001	1.883e-05
	MITF	c.323A>T	p.His108Leu	3	69988310	NM_000248	A	T	NA	5.845e-05	NFE: 0.0001	5.65e-05
	MITF	c.452G>A	p.Ser151Ser	3	69998213	NM_198159	G	A	NA	0	0	0
	MITF	c.45C>T	p.His15His	3	69986984	NM_000248	C	T	226728	0.0029	SAS: 0.0058	0.002759
	MITF	c.665A>G	p.Asp222Gly	3	70005636	NM_198159	A	G	NA	0	0	0
	MITF	c.73C>A	p.Gln25Lys	3	69987012	NM_000248	C	A	NA	0.0002	NFE: 0.0003	0.0001318
	MITF	c.829G>A	p.Ala277Thr	3	70008542	NM_000248	G	A	NA	7.463e-05	SAS: 0.0003	8.474e-05
	MITF	c.938G>A	p.Arg313Gln	3	70014077	NM_000248	G	A	NA	0	0	0
	MLH1	c.1076T>C	p.Met359Thr	3	37067165	NM_000249	T	C	230138	8.422e-06	NFE: 1.53e-05	9.415e-06
	MLH1	c.1166G>A	p.Arg389Gln	3	37067255	NM_000249	G	A	41633	7.416e-05	AFR: 0.0004	7.532e-05
	MLH1	c.1216A>G	p.Ser406Gly	3	37067305	NM_000249	A	G	220891	0	0	0
	MLH1	c.1360G>C	p.Gly454Arg	3	37067449	NM_000249	G	C	89705	0.0001	SAS: 0.0004	0.0001601
	MLH1	c.1852_1853delinsGC	p.Lys618Ala	3	37089130	NM_000249	A	G	17089	0.0034	NFE: 0.0054	0.003277
	MLH1	c.2029A>T	p.Ser677Cys	3	37090434	NM_000249	A	T	135849	8.249e-06	NFE: 1.5e-05	9.415e-06
	MLH1	c.2084C>G	p.Ser695Trp	3	37090489	NM_000249	C	G	229906	8.293e-06	SAS: 6.1e-05	9.415e-06
	MLH1	c.2174G>A	p.Arg725His	3	37092047	NM_000249	G	A	90082	0.0001	NFE: 0.0003	0.0001506
	MLH1	c.217C>G	p.Leu73Val	3	37042455	NM_000249	C	G	NA	8.249e-06	NFE: 1.501e-05	9.415e-06
	MLH1	c.649C>T	p.Arg217Cys	3	37053562	NM_000249	C	T	90303	0.0003	EAS: 0.0039	0.0003295
	MLH1	c.919G>A	p.Val307Met	3	37061835	NM_000249	G	A	185469	0	0	0
	MRE11A	c.121G>A	p.Asp41Asn	11	94224031	NM_005591	C	T	127970	0.0009	AFR: 0.0097	0.0009133
	MRE11A	c.1286T>C	p.Val429Ala	11	94194142	NM_005591	A	G	142344	0.0001	AFR: 0.0010	0.0001036
	MRE11A	c.1462C>T	p.Arg488Cys	11	94192612	NM_005591	G	A	127972	9.89e-05	NFE: 0.0001	0
	MRE11A	c.1475C>A	p.Ala492Asp	11	94192599	NM_005591	G	T	127031	0.0034	NFE: 0.0051	0.003201
	MRE11A	c.1727G>A	p.Arg576Gln	11	94180441	NM_005591	C	T	127974	0.0004	OTH: 0.0011	0.0004237
	MRE11A	c.1783+5G>C		11	94180380	NM_005591	C	G	NA	0.0007	AFR: 0.0074	0.0006873
	MRE11A	c.1798G>C	p.Glu600Gln	11	94179045	NM_005591	C	G	142511	0.0002	AFR: 0.0025	0.000226
	MRE11A	c.1811G>A	p.Arg604His	11	94179032	NM_005591	C	T	127976	0.0002	OTH: 0.0011	0.0001695
	MRE11A	c.1988A>C	p.Asp663Ala	11	94169004	NM_005591	T	G	NA	0	0	0
	MRE11A	c.2096A>G	p.Asn699Ser	11	94153322	NM_005591	T	C	233046	0	0	0
	MRE11A	c.293C>T	p.Ser98Leu	11	94219111	NM_005591	G	A	216611	1.655e-05	NFE: 3.011e-05	1.883e-05
	MRE11A	c.469A>G	p.Met157Val	11	94211976	NM_005591	T	C	142476	0.0002	EAS: 0.0020	0.0001695
	MRE11A	c.529G>A	p.Ala177Thr	11	94211916	NM_005591	C	T	127983	0.0002	NFE: 0.0003	0.0001789
	MRE11A	c.734A>G	p.His245Arg	11	94204851	NM_005591	T	C	NA	0	0	0
	MSH2	c.1045C>G	p.Pro349Ala	2	47643537	NM_000251	C	G	90512	9.062e-05	AMR: 0.0003	9.415e-05
	MSH2	c.1217G>A	p.Arg406Gln	2	47657021	NM_000251	G	A	90569	5.77e-05	NFE: 0.0001	4.708e-05
	MSH2	c.1563T>C	p.Tyr521Tyr	2	47693849	NM_000251	T	C	90698	0.0003	FIN: 0.0017	0.0002166
	MSH2	c.1784T>G	p.Leu595Arg	2	47702188	NM_000251	T	G	184645	0	0	0
	MSH2	c.1787A>G	p.Asn596Ser	2	47702191	NM_000251	A	G	41646	0.0003	AMR: 0.0006	0.0002919
	MSH2	c.1854A>G	p.Pro618Pro	2	47702258	NM_000251	A	G	187451	0	0	0
	MSH2	c.2224G>A	p.Asp742Asn	2	47705424	NM_000251	G	A	246264	0	0	0
	MSH2	c.2342C>G	p.Ala781Gly	2	47705542	NM_000251	C	G	336434	0	0	0
	MSH2	c.2503A>C	p.Asn835His	2	47707879	NM_000251	A	C	90988	8.243e-06	NFE: 1.5e-05	9.415e-06
	MSH2	c.2732T>G	p.Leu911Arg	2	47710015	NM_000251	T	G	91039	0.0001	NFE: 0.0002	8.476e-05
	MSH2	c.274C>G	p.Leu92Val	2	47635602	NM_000251	C	G	91041	6.598e-05	OTH: 0.0022	7.535e-05
	MSH2	c.499G>C	p.Asp167His	2	47637365	NM_000251	G	C	91112	0.0001	OTH: 0.0011	0.000113
	MSH2	c.727C>T	p.Arg243Trp	2	47639634	NM_000251	C	T	NA	8.257e-06	AFR: 9.638e-05	9.415e-06
	MSH2	c.728G>A	p.Arg243Gln	2	47639635	NM_000251	G	A	91189	1.652e-05	AMR: 8.649e-05	1.883e-05
	MSH6	c.1167C>T	p.Pro389Pro	2	48026289	NM_000179	C	T	237128	6.595e-05	AMR: 0.0002	0
	MSH6	c.1364A>C	p.Asn455Thr	2	48026486	NM_000179	A	C	142181	4.121e-05	AFR: 9.617e-05	2.825e-05
	MSH6	c.1844G>T	p.Cys615Phe	2	48026966	NM_000179	G	T	186038	0	0	0
	MSH6	c.1891T>C	p.Ser631Pro	2	48027013	NM_000179	T	C	NA	0	0	0
	MSH6	c.1960A>T	p.Met654Leu	2	48027082	NM_000179	A	T	NA	0	0	0
	MSH6	c.1994A>G	p.Glu665Gly	2	48027116	NM_000179	A	G	185132	0	0	0
	MSH6	c.2249C>G	p.Thr750Arg	2	48027371	NM_000179	C	G	NA	0	0	0
	MSH6	c.2561A>T	p.Lys854Met	2	48027683	NM_000179	A	T	89289	0.0004	EAS: 0.0015	0.0004239
	MSH6	c.2562G>T	p.Lys854Asn	2	48027684	NM_000179	G	T	336443	0.0001	OTH: 0.0011	0.0001036
	MSH6	c.2624T>A	p.Met875Lys	2	48027746	NM_000179	T	A	NA	0	0	0
	MSH6	c.2633T>C	p.Val878Ala	2	48027755	NM_000179	T	C	8931	0.0053	NFE: 0.0074	0.005131
	MSH6	c.2641delinsAAAA	p.Gly881delinsLysSer	2	48027762	NM_000179	TG	TAAAA	89305	0	0	0
	MSH6	c.2641G>A	p.Gly881Ser	2	48027763	NM_000179	G	A	NA	0	0	0
	MSH6	c.3151G>A	p.Val1051Ile	2	48028273	NM_000179	G	A	135839	0.0009	SAS: 0.0065	0.001008
	MSH6	c.3173-18T>A		2	48030541	NM_000179	T	A	138261	0.0007	AFR: 0.0079	0.0007532
	MSH6	c.3197A>G	p.Tyr1066Cys	2	48030583	NM_000179	A	G	142270	2.473e-05	NFE: 4.497e-05	9.415e-06
	MSH6	c.3217C>T	p.Pro1073Ser	2	48030603	NM_000179	C	T	41593	0.0003	NFE: 0.0006	0.0002636
	MSH6	c.3246G>A	p.Pro1082Pro	2	48030632	NM_000179	G	A	184530	7.417e-05	0	8.474e-05
	MSH6	c.3251A>G	p.Asp1084Gly	2	48030637	NM_000179	A	G	336444	0	0	0
	MSH6	c.3647-6T>A		2	48033337	NM_000179	T	A	127588	0.0004	AFR: 0.0041	0.0003766
	MSH6	c.3801+17T>C		2	48033514	NM_000179	T	C	NA	0.0005	AFR: 0.0050	0.0005084
	MSH6	c.3801+5G>A		2	48033502	NM_000179	G	A	NA	5.776e-05	NFE: 0.0002	6.591e-05
	MSH6	c.4001+2_4001+5delTAAC		2	48033791	NM_000179	GTAAC	G	89505	0.0013	EAS: 0.0042	0
	MSH6	c.663A>C	p.Glu221Asp	2	48025785	NM_000179	A	C	89552	0.0006	NFE: 0.0009	0.0005461
	MSH6	c.728G>A	p.Arg243His	2	48025850	NM_000179	G	A	182611	1.655e-05	AFR: 9.739e-05	9.415e-06
	MSH6	c.833T>A	p.Ile278Lys	2	48025955	NM_000179	T	A	230128	0	0	0
	MSH6	c.893G>A	p.Arg298Gln	2	48026015	NM_000179	G	A	186227	1.651e-05	AMR: 8.657e-05	1.883e-05
	MSH6	c.926C>G	p.Ser309Cys	2	48026048	NM_000179	C	G	127607	0.0003	SAS: 0.0024	0.000386
	MUTYH	c.1091G>A	p.Arg364His	1	45797428	NM_001128425	C	T	NA	1.728e-05	AFR: 0.0002	9.416e-06
	MUTYH	c.1234C>T	p.Arg412Cys	1	45797139	NM_001128425	G	A	41753	0.0008	NFE: 0.0012	0.000725
	MUTYH	c.1258C>A	p.Leu420Met	1	45797157	NM_001128425	G	T	41752	0.0006	OTH: 0.0011	0.0006308
	MUTYH	c.1431G>C	p.Thr477Thr	1	45796899	NM_001128425	C	G	NA	0.0049	EAS: 0.0281	0.00515
	MUTYH	c.1476+2C>T		1	45796852	NM_001128425	G	A	NA	0.0001	AFR: 0.0013	0.0001601
	MUTYH	c.1567C>T	p.Arg523Cys	1	45795061	NM_001128425	G	A	NA	4.943e-05	NFE: 8.991e-05	2.825e-05
	MUTYH	c.167A>G	p.Asn56Ser	1	45800095	NM_001128425	T	C	142369	2.471e-05	AFR: 0.0003	2.825e-05
	MUTYH	c.251A>G	p.Tyr84Cys	1	45799182	NM_001128425	T	C	41758	0	0	0
	MUTYH	c.454T>A	p.Trp152Arg	1	45798777	NM_001128425	A	T	NA	0	0	0
	MUTYH	c.551G>A	p.Arg184Gln	1	45798460	NM_001128425	C	T	NA	1.648e-05	EAS: 0.0001	1.883e-05
	MUTYH	c.650G>A	p.Arg217His	1	45798286	NM_001128425	C	T	230143	4.124e-05	AMR: 8.642e-05	4.708e-05
	MUTYH	c.715G>A	p.Val239Ile	1	45798136	NM_001128425	C	T	NA	5.851e-05	EAS: 0.0003	4.708e-05
	MUTYH	c.920G>A	p.Arg307Gln	1	45797851	NM_001128425	C	T	NA	7.436e-05	AFR: 0.0005	6.591e-05
	MUTYH	c.925C>T	p.Arg309Cys	1	45797846	NM_001128425	G	A	41765	0.0004	NFE: 0.0008	0.0004331
	NBN	c.1035C>T	p.Gly345Gly	8	90971042	NM_002485	G	A	127853	0.0005	EAS: 0.0067	0.0005273
	NBN	c.1262T>C	p.Leu421Ser	8	90967646	NM_002485	A	G	127009	0.0004	NFE: 0.0006	0.0003766
	NBN	c.1354A>C	p.Thr452Pro	8	90967554	NM_002485	T	G	142374	0.0003	AFR: 0.0027	0.000273
	NBN	c.1454C>T	p.Thr485Met	8	90965863	NM_002485	G	A	232337	2.528e-05	NFE: 4.612e-05	2.825e-05
	NBN	c.227C>A	p.Thr76Asn	8	90993696	NM_002485	G	T	140980	1.649e-05	NFE: 2.999e-05	0
	NBN	c.425A>G	p.Asn142Ser	8	90993017	NM_002485	T	C	127871	0.0001	OTH: 0.0022	0.0001036
	NBN	c.511A>G	p.Ile171Val	8	90990521	NM_002485	T	C	6946	0.0014	OTH: 0.0022	0.001158
	NBN	c.628G>T	p.Val210Phe	8	90983475	NM_002485	C	A	127014	0.0005	NFE: 0.0008	0.0004803
	NBN	c.643C>T	p.Arg215Trp	8	90983460	NM_002485	G	A	6948	0.0030	NFE: 0.0047	0.002957
	NBN	c.671G>A	p.Gly224Glu	8	90983432	NM_002485	C	T	141380	5.057e-05	AMR: 8.809e-05	4.71e-05
	NBN	c.940G>A	p.Val314Met	8	90976692	NM_002485	C	T	141727	1.648e-05	NFE: 2.998e-05	1.883e-05
	NF1	c.1367C>T	p.Ala456Val	17	29533364	NM_001042492	C	T	NA	0	0	0
	NF1	c.1845+13A>T		17	29550598	NM_001042492	A	T	226850	0.0028	AFR: 0.0309	0.002791
	NF1	c.1849G>A	p.Ala617Thr	17	29552116	NM_001042492	G	A	NA	0	0	0
	NF1	c.1894T>A	p.Cys632Ser	17	29552161	NM_001042492	T	A	134883	3.3e-05	AFR: 9.662e-05	1.883e-05
	NF1	c.3613T>G	p.Phe1205Val	17	29560136	NM_001042492	T	G	369956	0	0	0
	NF1	c.3621A>G	p.Arg1207Arg	17	29560144	NM_001042492	A	G	187649	2.471e-05	AFR: 0.0003	9.415e-06
	NF1	c.3636C>A	p.Val1212Val	17	29560159	NM_001042492	C	A	184274	0.0001	NFE: 0.0002	0.000113
	NF1	c.3765A>G	p.Gln1255Gln	17	29562685	NM_001042492	A	G	184300	2.471e-05	FIN: 0.0002	2.825e-05
	NF1	c.3883A>G	p.Thr1295Ala	17	29562948	NM_001042492	A	G	185777	9.886e-05	SAS: 0.0001	8.474e-05
	NF1	c.4055G>C	p.Ser1352Thr	17	29576082	NM_001042492	G	C	234185	0	0	0
	NF1	c.4153A>G	p.Lys1385Glu	17	29579998	NM_001042492	A	G	369956	0	0	0
	NF1	c.4174-8_4174-6delGTT		17	29585351	NM_001042492	CTTG	C	221137	0.0006	NFE: 0.0009	0.0005461
	NF1	c.5035A>G	p.Ile1679Val	17	29653037	NM_001042492	A	G	41672	0.0037	AMR: 0.0376	0.004067
	NF1	c.5215G>C	p.Val1739Leu	17	29653217	NM_001042492	G	C	232734	0	0	0
	NF1	c.5426C>T	p.Pro1809Leu	17	29654674	NM_001042492	C	T	142084	4.942e-05	AMR: 0.0003	4.708e-05
	NF1	c.5513C>G	p.Ser1838Cys	17	29654761	NM_001042492	C	G	142804	7.414e-05	NFE: 0.0001	6.591e-05
	NF1	c.6694C>G	p.Leu2232Val	17	29664888	NM_001042492	C	G	NA	0	0	0
	NF1	c.6773G>A	p.Arg2258Gln	17	29665111	NM_001042492	G	A	185248	0	0	0
	NF1	c.6929C>T	p.Pro2310Leu	17	29667530	NM_001042492	C	T	41675	0.0002	OTH: 0.0011	0.0001883
	NF1	c.7520C>T	p.Thr2507Ile	17	29679337	NM_001042492	C	T	141844	4.944e-05	NFE: 8.995e-05	2.825e-05
	NF1	c.7534G>T	p.Gly2512Cys	17	29679351	NM_001042492	G	T	369956	0	0	0
	NF1	c.7595C>T	p.Ala2532Val	17	29679412	NM_001042492	C	T	41678	0.0007	OTH: 0.0022	0.0006497
	NF1	c.7870-8C>A		17	29684279	NM_001042492	C	A	220337	2.474e-05	AFR: 9.619e-05	1.883e-05
	NF1	c.7897G>A	p.Glu2633Lys	17	29684314	NM_001042492	G	A	NA	8.244e-06	AFR: 9.615e-05	9.415e-06
	NF1	c.8041A>G	p.Ile2681Val	17	29685568	NM_001042492	A	G	141895	0.0002	OTH: 0.0011	0.0001695
	NF1	c.8105A>T	p.Tyr2702Phe	17	29685632	NM_001042492	A	T	41679	0.0001	NFE: 0.0002	8.474e-05
	NF1	c.8206G>A	p.Asp2736Asn	17	29687550	NM_001042492	G	A	NA	0	0	0
	NF1	c.845A>G	p.Gln282Arg	17	29509640	NM_001042492	A	G	NA	0	0	0
	NF2	c.1123-16G>A		22	30069242	NM_000268	G	A	341178	0	0	0
	NF2	c.1445C>T	p.Pro482Leu	22	30070929	NM_000268	C	T	NA	8.89e-05	EAS: 0.0009	1.99e-05
	NF2	c.1446G>A	p.Pro482Pro	22	30070930	NM_000268	G	A	NA	9.16e-05	NFE: 0.0002	1.004e-05
	NF2	c.1639G>A	p.Glu547Lys	22	30077492	NM_000268	G	A	NA	0.0003	FIN: 0.0017	0.0002542
	NF2	c.215T>C	p.Val72Ala	22	30032840	NM_000268	T	C	NA	0	0	0
	NF2	c.319G>A	p.Glu107Lys	22	30035157	NM_000268	G	A	NA	0	0	0
	NF2	c.601G>T	p.Asp201Tyr	22	30054179	NM_000268	G	T	NA	0	0	0
	NRAS	c.259A>T	p.Ser87Cys	1	115256452	NM_002524	T	A	NA	0	0	0
	NRAS	c.300T>A	p.Ile100Ile	1	115252340	NM_002524	A	T	NA	3.3e-05	SAS: 0.0002	3.766e-05
	NRAS	c.461A>G	p.Asp154Gly	1	115251265	NM_002524	T	C	NA	0	0	0
	PALB2	c.1222T>G	p.Tyr408Asp	16	23646645	NM_024675	A	C	185091	0	0	0
	PALB2	c.1256G>T	p.Cys419Phe	16	23646611	NM_024675	C	A	246408	0	0	0
	PALB2	c.1322A>G	p.Lys441Arg	16	23646545	NM_024675	T	C	NA	0	0	0
	PALB2	c.1337A>T	p.Asp446Val	16	23646530	NM_024675	T	A	216742	2.489e-05	AFR: 0.0003	2.826e-05
	PALB2	c.1540G>A	p.Gly514Arg	16	23646327	NM_024675	C	T	232748	6.589e-05	AMR: 0.0007	7.532e-05
	PALB2	c.1544A>G	p.Lys515Arg	16	23646323	NM_024675	T	C	126607	4.942e-05	AMR: 0.0002	3.766e-05
	PALB2	c.1697G>A	p.Arg566His	16	23641778	NM_024675	C	T	128122	1.035e-05	0	9.416e-06
	PALB2	c.1879G>A	p.Val627Met	16	23641596	NM_024675	C	T	NA	0	0	0
	PALB2	c.1939C>A	p.His647Asn	16	23641536	NM_024675	G	T	NA	0	0	0
	PALB2	c.2135C>T	p.Ala712Val	16	23641340	NM_024675	G	A	126637	0.0002	NFE: 0.0004	0.0002636
	PALB2	c.2200A>T	p.Thr734Ser	16	23641275	NM_024675	T	A	126640	2.471e-05	NFE: 4.495e-05	1.883e-05
	PALB2	c.2201C>A	p.Thr734Asn	16	23641274	NM_024675	G	T	241541	0	0	0
	PALB2	c.2402A>G	p.Asp801Gly	16	23641073	NM_024675	T	C	318562	0	0	0
	PALB2	c.2483G>A	p.Cys828Tyr	16	23640992	NM_024675	C	T	NA	0	0	0
	PALB2	c.2561A>G	p.Asn854Ser	16	23640550	NM_024675	T	C	220808	0	0	0
	PALB2	c.2608G>A	p.Val870Ile	16	23637697	NM_024675	C	T	142746	8.237e-06	0	0
	PALB2	c.2792T>G	p.Leu931Arg	16	23635372	NM_024675	A	C	186840	8.436e-06	NFE: 1.544e-05	9.415e-06
	PALB2	c.2816T>G	p.Leu939Trp	16	23635348	NM_024675	A	C	126683	0.0010	NFE: 0.0016	0.0008286
	PALB2	c.2821A>G	p.Ile941Val	16	23635343	NM_024675	T	C	NA	2.566e-05	AMR: 0.0003	2.825e-05
	PALB2	c.2978C>T	p.Thr993Met	16	23634308	NM_024675	G	A	232056	2.471e-05	EAS: 0.0001	1.883e-05
	PALB2	c.298C>T	p.Leu100Phe	16	23647569	NM_024675	G	A	126698	0.0002	NFE: 0.0004	0.0001789
	PALB2	c.2993G>A	p.Gly998Glu	16	23634293	NM_024675	C	T	126699	0.0158	NFE: 0.0214	0.015
	PALB2	c.3056T>C	p.Val1019Ala	16	23632740	NM_024675	A	G	126709	4.119e-05	AFR: 0.0005	3.766e-05
	PALB2	c.3110T>C	p.Ile1037Thr	16	23632686	NM_024675	A	G	NA	0	0	0
	PALB2	c.3203G>A	p.Gly1068Glu	16	23619332	NM_024675	C	T	NA	8.293e-06	NFE: 1.506e-05	0
	PALB2	c.3245G>C	p.Ser1082Thr	16	23619290	NM_024675	C	G	318562	0	0	0
	PALB2	c.3278T>C	p.Ile1093Thr	16	23619257	NM_024675	A	G	182774	1.647e-05	AMR: 8.64e-05	1.883e-05
	PALB2	c.3495G>A	p.Ser1165Ser	16	23614846	NM_024675	C	T	126745	0.0007	OTH: 0.0011	0.0005649
	PALB2	c.3508C>T	p.His1170Tyr	16	23614833	NM_024675	G	A	141320	7.414e-05	NFE: 0.0001	7.532e-05
	PALB2	c.3525A>G	p.Gln1175Gln	16	23614816	NM_024675	T	C	183868	0	0	0
	PALB2	c.48+7G>C		16	23652424	NM_024675	C	G	NA	9.338e-05	AFR: 0.0012	9.416e-05
	PALB2	c.563C>G	p.Ala188Gly	16	23647304	NM_024675	G	C	141738	8.237e-06	NFE: 1.498e-05	9.415e-06
	PALB2	c.668T>C	p.Ile223Thr	16	23647199	NM_024675	A	G	245749	2.474e-05	AFR: 0.0003	2.825e-05
	PAX5	c.1029G>A	p.Gly343Gly	9	36846910	NM_016734	C	T	135004	0.0252	OTH: 0.0410	0.024
	PAX5	c.1031G>A	p.Ser344Asn	9	36846908	NM_016734	C	T	NA	0	0	0
	PAX5	c.638C>T	p.Ser213Leu	9	36966688	NM_016734	G	A	135001	0.0007	OTH: 0.0011	0.0005743
	PAX5	c.781-16_781-15delCT		9	36923495	NM_016734	CAG	C	253667	5.101e-05	SAS: 0.0001	3.766e-05
	PAX5	c.914G>A	p.Arg305His	9	36882099	NM_016734	C	T	NA	0.0001	NFE: 0.0002	8.476e-05
	PAX5	c.964G>A	p.Ala322Thr	9	36882049	NM_016734	C	T	135003	0.0109	OTH: 0.0146	0.009501
	PDGFRA	c.1122G>C	p.Arg374Ser	4	55136800	NM_006206	G	C	135028	0.0006	AFR: 0.0063	0.0005743
	PDGFRA	c.1135T>G	p.Leu379Val	4	55136813	NM_006206	T	G	218679	0.0001	NFE: 0.0003	0.0001412
	PDGFRA	c.1319C>T	p.Thr440Met	4	55138642	NM_006206	C	T	240303	0.0001	EAS: 0.0010	0.000113
	PDGFRA	c.1320G>A	p.Thr440Thr	4	55138643	NM_006206	G	A	240304	0.0023	AFR: 0.0238	0.002307
	PDGFRA	c.1388C>G	p.Thr463Ser	4	55139727	NM_006206	C	G	240305	0.0002	SAS: 0.0008	0.0002071
	PDGFRA	c.1425G>T	p.Glu475Asp	4	55139764	NM_006206	G	T	NA	1.648e-05	AMR: 8.64e-05	1.883e-05
	PDGFRA	c.1459C>A	p.Arg487Ser	4	55139798	NM_006206	C	A	NA	0	0	0
	PDGFRA	c.1651C>A	p.Gln551Lys	4	55140790	NM_006206	C	A	NA	1.647e-05	SAS: 6.057e-05	1.883e-05
	PDGFRA	c.17C>T	p.Pro6Leu	4	55124952	NM_006206	C	T	240317	6.589e-05	NFE: 0.0001	6.591e-05
	PDGFRA	c.1895C>T	p.Thr632Met	4	55144066	NM_006206	C	T	NA	8.365e-06	SAS: 6.312e-05	9.415e-06
	PDGFRA	c.201C>T	p.Ser67Ser	4	55127413	NM_006206	C	T	240322	0.0031	AFR: 0.0082	0.003154
	PDGFRA	c.20C>T	p.Ala7Val	4	55124955	NM_006206	C	T	240325	8.236e-06	NFE: 1.498e-05	9.415e-06
	PDGFRA	c.2230C>T	p.Pro744Ser	4	55146556	NM_006206	C	T	135015	0.0007	AFR: 0.0067	0.0006497
	PDGFRA	c.2366G>A	p.Gly789Asp	4	55151580	NM_006206	G	A	NA	8.24e-06	AMR: 8.642e-05	9.415e-06
	PDGFRA	c.236G>A	p.Gly79Asp	4	55127448	NM_006206	G	A	41797	0.0087	FIN: 0.0156	0.008191
	PDGFRA	c.2437A>C	p.Asn813His	4	55151651	NM_006206	A	C	369441	0	0	0
	PDGFRA	c.2692G>A	p.Gly898Ser	4	55154983	NM_006206	G	A	NA	0	0	0
	PDGFRA	c.2899C>G	p.Leu967Val	4	55156498	NM_006206	C	G	135018	0.0004	AFR: 0.0048	0.0004708
	PDGFRA	c.3040G>A	p.Ala1014Thr	4	55156639	NM_006206	G	A	NA	1.647e-05	NFE: 2.997e-05	1.883e-05
	PDGFRA	c.3155C>T	p.Thr1052Met	4	55161324	NM_006206	C	T	39618	0.0001	NFE: 0.0002	0.0001036
	PDGFRA	c.599C>G	p.Thr200Ser	4	55130065	NM_006206	C	G	41800	0.0008	FIN: 0.0014	0.0005744
	PDGFRA	c.661C>T	p.Leu221Phe	4	55131118	NM_006206	C	T	41801	0.0038	NFE: 0.0054	0.003484
	PDGFRA	c.753_759delAGAAGTGGT		4	55131209	NM_006206	GAGAAGTGGT	G	369441	0	0	0
	PDGFRA	c.820A>T	p.Thr274Ser	4	55133516	NM_006206	A	T	NA	3.296e-05	NFE: 5.994e-05	9.415e-06
	PDGFRA	c.842C>T	p.Thr281Met	4	55133538	NM_006206	C	T	240363	2.472e-05	AMR: 0.0002	1.883e-05
	PDGFRA	c.896T>C	p.Val299Ala	4	55133592	NM_006206	T	C	41802	3.297e-05	NFE: 5.995e-05	3.766e-05
	PDGFRA	c.984C>A	p.Asn328Lys	4	55133771	NM_006206	C	A	NA	0	0	0
	PDGFRA	c.996C>T	p.Val332Val	4	55133783	NM_006206	C	T	221101	0.0020	AMR: 0.0037	0.001836
	PHOX2B	c.26T>A	p.Leu9His	4	41750602	NM_003924	A	T	NA	0	0	0
	PHOX2B	c.552C>T	p.Ser184Ser	4	41748217	NM_003924	G	A	227015	0.0085	OTH: 0.0122	0.008088
	PHOX2B	c.648C>T	p.Gly216Gly	4	41748121	NM_003924	G	A	NA	0	0	0
	PHOX2B	c.659C>G	p.Pro220Arg	4	41748110	NM_003924	G	C	NA	0	0	0
	PHOX2B	c.773C>A	p.Ala258Glu	4	41747996	NM_003924	G	T	348809	0.0005	AMR: 0.0149	0.0002304
	PMS2	c.1004A>G	p.Asn335Ser	7	6029571	NM_000535	T	C	127751	0.0003	NFE: 0.0004	0.0002448
	PMS2	c.1354G>C	p.Gly452Arg	7	6027042	NM_000535	C	G	230651	1.648e-05	EAS: 0.0002	1.883e-05
	PMS2	c.1438G>A	p.Gly480Arg	7	6026958	NM_000535	C	T	220433	3.295e-05	EAS: 0.0001	3.766e-05
	PMS2	c.1531A>G	p.Thr511Ala	7	6026865	NM_000535	T	C	41703	0.0251	FIN: 0.0549	0.025
	PMS2	c.383C>T	p.Ser128Leu	7	6042238	NM_000535	G	A	135943	0.0008	AFR: 0.0051	0.0007626
	PMS2	c.475G>A	p.Val159Met	7	6042146	NM_000535	C	T	127791	8.33e-05	NFE: 0.0002	5.649e-05
	PMS2	c.487T>C	p.Phe163Leu	7	6042134	NM_000535	A	G	127792	0	0	0
	PMS2	c.52A>G	p.Ile18Val	7	6045634	NM_000535	T	C	41713	0.0091	FIN: 0.0304	0.009097
	PMS2	c.53T>C	p.Ile18Thr	7	6045633	NM_000535	A	G	41714	0.0003	NFE: 0.0005	0.000253
	PMS2	c.620G>A	p.Gly207Glu	7	6038824	NM_000535	C	T	127793	0.0004	SAS: 0.0022	0.0004708
	PMS2	c.652G>A	p.Gly218Ser	7	6038792	NM_000535	C	T	NA	0	0	0
	PMS2	c.706-5_706-4delTT		7	6037057	NM_000535	GAA	G	218462	0.0078	EAS: 0.0130	0
	PMS2	c.830C>A	p.Thr277Lys	7	6035238	NM_000535	G	T	135946	0.0004	AFR: 0.0045	0.0003484
	PMS2	c.86G>C	p.Gly29Ala	7	6045600	NM_000535	C	G	41721	0.0005	NFE: 0.0008	0.0003887
	PMS2	c.949C>A	p.Gln317Lys	7	6031643	NM_000535	G	T	NA	8.293e-06	AFR: 9.694e-05	9.415e-06
	PMS2	c.953A>G	p.Tyr318Cys	7	6031639	NM_000535	T	C	41722	0.0004	OTH: 0.0034	0.0003578
	POLE	c.1145G>A	p.Ser382Asn	12	133252065	NM_006231	C	T	240379	0.0001	SAS: 0.0010	0.0001506
	POLE	c.1184G>A	p.Gly395Glu	12	133252026	NM_006231	C	T	246477	9.069e-05	AFR: 0.0009	0.0001036
	POLE	c.1288G>A	p.Ala430Thr	12	133250232	NM_006231	C	T	240386	0.0007	SAS: 0.0039	0.0007344
	POLE	c.1359+9G>A		12	133250152	NM_006231	C	T	NA	0.0012	NFE: 0.0118	0.00145
	POLE	c.139C>T	p.Arg47Trp	12	133257789	NM_006231	G	A	240391	0.0009	FIN: 0.0014	0.0008568
	POLE	c.151G>A	p.Glu51Lys	12	133257777	NM_006231	C	T	NA	0	0	0
	POLE	c.16G>C	p.Gly6Arg	12	133263886	NM_006231	C	G	218680	0.0019	0	0.001394
	POLE	c.1738C>A	p.His580Asn	12	133248857	NM_006231	G	T	NA	0.0001	NFE: 0.0002	0.0001036
	POLE	c.2053C>T	p.Arg685Trp	12	133245062	NM_006231	G	A	NA	7.711e-05	SAS: 0.0005	8.475e-05
	POLE	c.2087C>T	p.Pro696Leu	12	133245028	NM_006231	G	A	240420	8.419e-06	NFE: 1.515e-05	0
	POLE	c.2089C>G	p.Pro697Ala	12	133245026	NM_006231	G	C	240421	0.0012	0	0.0003578
	POLE	c.2089C>T	p.Pro697Ser	12	133245026	NM_006231	G	A	240422	0.0012	0	0.0003578
	POLE	c.2090C>G	p.Pro697Arg	12	133245025	NM_006231	G	C	240423	0.0009	NFE: 0.0013	0.0008757
	POLE	c.2321T>C	p.Val774Ala	12	133242035	NM_006231	A	G	NA	1.665e-05	SAS: 0.0001	1.883e-05
	POLE	c.2510T>C	p.Phe837Ser	12	133241007	NM_006231	A	G	289003	0.0002	NFE: 0.0003	0.0001695
	POLE	c.2519C>G	p.Ala840Gly	12	133240998	NM_006231	G	C	NA	0	0	0
	POLE	c.2550C>T	p.Ile850Ile	12	133240967	NM_006231	G	A	221167	0.0043	AFR: 0.0461	0.004293
	POLE	c.271G>A	p.Gly91Arg	12	133257207	NM_006231	C	T	NA	0	0	0
	POLE	c.2792T>C	p.Phe931Ser	12	133238185	NM_006231	A	G	240446	4.118e-05	NFE: 7.492e-05	4.708e-05
	POLE	c.2818A>G	p.Met940Val	12	133238159	NM_006231	T	C	246345	4.119e-05	AFR: 9.61e-05	2.825e-05
	POLE	c.285+3_285+8delAAGCC		12	133257184	NM_006231	GGGGCTT	G	NA	0	0	0
	POLE	c.2865-4delT		12	133237753	NM_006231	GA	G	289003	0.0097	AMR: 0.0178	0
	POLE	c.296C>T	p.Pro99Leu	12	133256798	NM_006231	G	A	240452	0.0003	AFR: 0.0031	0.0003295
	POLE	c.2974G>A	p.Ala992Thr	12	133237641	NM_006231	C	T	240453	0.0003	EAS: 0.0043	0.0003484
	POLE	c.3046G>A	p.Val1016Met	12	133237569	NM_006231	C	T	220916	0.0010	NFE: 0.0016	0.001007
	POLE	c.3229C>T	p.Arg1077Cys	12	133235927	NM_006231	G	A	NA	4.965e-05	SAS: 0.0002	3.766e-05
	POLE	c.3245G>A	p.Arg1082His	12	133235911	NM_006231	C	T	240461	0.0001	AFR: 0.0004	0.0001506
	POLE	c.3275+16->GTCACGGAGAGGTGAGGGCTCCCCCC		12	133235865	NM_006231	T	TGGGGGGAGCCCTCACCTCTCCGTGAC	254064	0.0027	AFR: 0.0296	0.002375
	POLE	c.34G>A	p.Asp12Asn	12	133263868	NM_006231	C	T	NA	0	0	0
	POLE	c.3718G>A	p.Glu1240Lys	12	133226340	NM_006231	C	T	240475	0.0008	NFE: 0.0015	0.0008097
	POLE	c.3851G>A	p.Arg1284Gln	12	133226046	NM_006231	C	T	240480	0.0006	NFE: 0.0010	0.000576
	POLE	c.3858_3881delCCTCGCCCGCAGGAAGAGGCAGCG	p.Leu1287_Arg1294del	12	133226015	NM_006231	ACGCTGCCTCTTCCTGCGGGCGAGG	A	289003	8.605e-06	NFE: 1.581e-05	9.424e-06
	POLE	c.3913G>A	p.Gly1305Arg	12	133225984	NM_006231	C	T	240489	0.0006	SAS: 0.0038	0.0006403
	POLE	c.4055G>C	p.Gly1352Ala	12	133225609	NM_006231	C	G	NA	0.0001	FIN: 0.0003	0.0001412
	POLE	c.4057A>G	p.Ser1353Gly	12	133225607	NM_006231	T	C	240500	0.0005	FIN: 0.0017	0.0004802
	POLE	c.4169G>A	p.Arg1390His	12	133220544	NM_006231	C	T	NA	0.0001	AMR: 0.0003	0.000113
	POLE	c.4237G>A	p.Glu1413Lys	12	133220476	NM_006231	C	T	240507	0.0003	AMR: 0.0014	0.0002919
	POLE	c.4246G>A	p.Ala1416Thr	12	133220467	NM_006231	C	T	240508	0.0002	AFR: 0.0009	0.0002166
	POLE	c.4259C>T	p.Ala1420Val	12	133220454	NM_006231	G	A	220758	0.0031	FIN: 0.0108	0.003135
	POLE	c.4663G>A	p.Val1555Ile	12	133219471	NM_006231	C	T	NA	0	0	0
	POLE	c.4859G>C	p.Gly1620Ala	12	133219185	NM_006231	C	G	289003	0	0	0
	POLE	c.4872G>A	p.Trp1624*	12	133219172	NM_006231	C	T	NA	8.27e-06	AFR: 9.656e-05	0
	POLE	c.4952+17_4952+19dupCGT		12	133219072	NM_006231	A	AACG	289003	0.0063	NFE: 0.0103	0.005885
	POLE	c.5135C>T	p.Ala1712Val	12	133218801	NM_006231	G	A	221104	0.0011	AFR: 0.0117	0.001045
	POLE	c.5274C>T	p.Phe1758Phe	12	133218337	NM_006231	G	A	NA	0	0	0
	POLE	c.5332G>A	p.Ala1778Thr	12	133218279	NM_006231	C	T	NA	8.289e-06	EAS: 0.0001	9.415e-06
	POLE	c.5570A>G	p.Lys1857Arg	12	133214708	NM_006231	T	C	221105	0.0009	AFR: 0.0103	0.0009039
	POLE	c.5804G>A	p.Cys1935Tyr	12	133212485	NM_006231	C	T	221083	0.0030	AFR: 0.0279	0.003041
	POLE	c.6124G>A	p.Gly2042Arg	12	133209262	NM_006231	C	T	289003	6.698e-05	AFR: 0.0003	7.533e-05
	POLE	c.6274G>A	p.Gly2092Ser	12	133208957	NM_006231	C	T	NA	3.296e-05	AFR: 0.0002	2.825e-05
	POLE	c.6335T>C	p.Leu2112Pro	12	133202899	NM_006231	A	G	289003	0	0	0
	POLE	c.6494G>A	p.Arg2165His	12	133202740	NM_006231	C	T	220837	0.0092	OTH: 0.0192	0.006074
	POLE	c.665G>A	p.Arg222His	12	133254219	NM_006231	C	T	NA	0	0	0
	POLE	c.6763A>T	p.Ile2255Phe	12	133201381	NM_006231	T	A	221175	0.0043	FIN: 0.0249	0.004425
	POLE	c.6775C>T	p.Arg2259Trp	12	133201369	NM_006231	G	A	289003	0	0	0
	POLE	c.6817A>T	p.Thr2273Ser	12	133201327	NM_006231	T	A	240621	0.0015	AFR: 0.0165	0.001601
	POLE	c.691C>T	p.Arg231Cys	12	133254193	NM_006231	G	A	240623	0.0001	NFE: 0.0002	0.0001318
	POLE	c.861T>A	p.Asp287Glu	12	133253180	NM_006231	A	T	221000	0.0009	NFE: 0.0015	0.0007532
	POLE	c.940T>G	p.Ser314Ala	12	133252760	NM_006231	A	C	224589	8.245e-05	NFE: 0.0001	8.474e-05
	PTCH1	c.104G>A	p.Arg35Gln	9	98270540	NM_000264	C	T	135094	3.698e-05	AFR: 0.0002	9.622e-06
	PTCH1	c.109G>C	p.Gly37Arg	9	98270535	NM_000264	C	G	237450	0.0017	EAS: 0.0165	0.001415
	PTCH1	c.1177G>A	p.Ala393Thr	9	98241320	NM_000264	C	T	8221	0.0005	SAS: 0.0033	0.0005084
	PTCH1	c.1282G>T	p.Asp428Tyr	9	98240402	NM_000264	C	A	NA	0	0	0
	PTCH1	c.142G>T	p.Asp48Tyr	9	98270502	NM_000264	C	A	NA	1.792e-05	NFE: 3.267e-05	1.884e-05
	PTCH1	c.1664A>G	p.Asn555Ser	9	98238380	NM_000264	T	C	220341	9.602e-05	FIN: 0.0002	9.415e-05
	PTCH1	c.1808G>A	p.Arg603His	9	98232134	NM_000264	C	T	367669	9.06e-05	AMR: 0.0005	7.532e-05
	PTCH1	c.1810G>A	p.Glu604Lys	9	98232132	NM_000264	C	T	NA	2.471e-05	EAS: 0.0001	9.415e-06
	PTCH1	c.2059G>A	p.Val687Met	9	98231224	NM_000264	C	T	NA	4.119e-05	AFR: 0.0005	3.766e-05
	PTCH1	c.2117G>A	p.Ser706Asn	9	98231166	NM_000264	C	T	NA	0	0	0
	PTCH1	c.2131C>G	p.Leu711Val	9	98231152	NM_000264	G	C	NA	0	0	0
	PTCH1	c.2173C>T	p.Pro725Ser	9	98231110	NM_000264	G	A	41654	0.0009	NFE: 0.0014	0.0008003
	PTCH1	c.2177C>G	p.Pro726Arg	9	98231106	NM_000264	G	C	135877	0.0001	NFE: 0.0002	0.000113
	PTCH1	c.2215_2216delinsTT	p.His739Phe	9	98231067	NM_000264	TG	AA	367678	0.0001	FIN: 0.0005	0
	PTCH1	c.2215C>T	p.His739Tyr	9	98231068	NM_000264	G	A	NA	0.0001	FIN: 0.0005	0.000113
	PTCH1	c.2222C>T	p.Ala741Val	9	98231061	NM_000264	G	A	135095	0.0006	EAS: 0.0088	0.0006591
	PTCH1	c.2270T>C	p.Phe757Ser	9	98229688	NM_000264	A	G	237468	0.0004	SAS: 0.0030	0.000499
	PTCH1	c.2377G>A	p.Ala793Thr	9	98229581	NM_000264	C	T	NA	0	0	0
	PTCH1	c.2479A>G	p.Ser827Gly	9	98229479	NM_000264	T	C	8223	0.0008	EAS: 0.0106	0.0007721
	PTCH1	c.2485G>A	p.Val829Met	9	98229473	NM_000264	C	T	41655	0.0003	SAS: 0.0006	0.0003201
	PTCH1	c.2680G>A	p.Asp894Asn	9	98224161	NM_000264	C	T	183067	0.0003	AFR: 0.0026	0.000273
	PTCH1	c.2717G>A	p.Arg906His	9	98222052	NM_000264	C	T	NA	2.475e-05	SAS: 6.063e-05	2.825e-05
	PTCH1	c.2799G>A	p.Ala933Ala	9	98221970	NM_000264	C	T	215457	0.0011	AFR: 0.0121	0.001149
	PTCH1	c.2965G>A	p.Glu989Lys	9	98220498	NM_000264	C	T	NA	0	0	0
	PTCH1	c.3002A>G	p.Tyr1001Cys	9	98220461	NM_000264	T	C	NA	0	0	0
	PTCH1	c.3038A>G	p.Tyr1013Cys	9	98220425	NM_000264	T	C	NA	0	0	0
	PTCH1	c.3155C>T	p.Thr1052Met	9	98220308	NM_000264	G	A	8224	0.0006	NFE: 0.0010	0.0005178
	PTCH1	c.3241G>A	p.Val1081Met	9	98218623	NM_000264	C	T	135097	9.893e-05	OTH: 0.0011	0.0001036
	PTCH1	c.3376G>A	p.Val1126Ile	9	98215833	NM_000264	C	T	135099	0.0005	NFE: 0.0008	0.0004708
	PTCH1	c.3487G>A	p.Gly1163Ser	9	98212185	NM_000264	C	T	41660	0.0006	NFE: 0.0009	0.0005743
	PTCH1	c.3610G>A	p.Val1204Met	9	98211545	NM_000264	C	T	NA	0	0	9.735e-06
	PTCH1	c.3629C>T	p.Pro1210Leu	9	98211526	NM_000264	G	A	216383	0.0003	FIN: 0.0010	0.0002288
	PTCH1	c.3631C>T	p.Pro1211Ser	9	98211524	NM_000264	G	A	220525	9.806e-05	EAS: 0.0004	3.811e-05
	PTCH1	c.3748C>A	p.Pro1250Thr	9	98211407	NM_000264	G	T	367678	0	0	0
	PTCH1	c.3755A>C	p.His1252Pro	9	98211400	NM_000264	T	G	367678	0	0	0
	PTCH1	c.3845C>T	p.Pro1282Leu	9	98209693	NM_000264	G	A	41661	0.0027	AFR: 0.0320	0.002575
	PTCH1	c.3947A>G	p.Tyr1316Cys	9	98209591	NM_000264	T	C	132723	0.0006	OTH: 0.0011	0.0005505
	PTCH1	c.3992C>G	p.Ser1331Cys	9	98209546	NM_000264	G	C	NA	8.658e-06	NFE: 1.591e-05	9.528e-06
	PTCH1	c.4024C>T	p.Arg1342Cys	9	98209514	NM_000264	G	A	NA	2.599e-05	AMR: 0.0002	2.863e-05
	PTCH1	c.4027G>A	p.Gly1343Arg	9	98209511	NM_000264	C	T	41664	0.0001	NFE: 0.0002	0.0001241
	PTCH1	c.4049G>A	p.Arg1350Gln	9	98209489	NM_000264	C	T	NA	0	0	0
	PTCH1	c.4172G>A	p.Arg1391Gln	9	98209366	NM_000264	C	T	367678	5.054e-05	AMR: 8.684e-05	5.651e-05
	PTCH1	c.4195C>T	p.Pro1399Ser	9	98209343	NM_000264	G	A	NA	0	0	0
	PTCH1	c.4219G>A	p.Gly1407Ser	9	98209319	NM_000264	C	T	135106	0.0001	SAS: 0.0004	0.0001412
	PTCH1	c.4255C>T	p.Arg1419Trp	9	98209283	NM_000264	G	A	NA	1.649e-05	0	1.883e-05
	PTCH1	c.4258T>C	p.Cys1420Arg	9	98209280	NM_000264	A	G	219394	0	0	0
	PTCH1	c.4324C>T	p.Arg1442Trp	9	98209214	NM_000264	G	A	41666	0.0014	OTH: 0.0088	0.001497
	PTCH1	c.46G>A	p.Gly16Ser	9	98270598	NM_000264	C	T	367677	0	0	0
	PTCH1	c.552G>T	p.Gln184His	9	98247999	NM_000264	C	A	216392	3.295e-05	NFE: 5.994e-05	3.766e-05
	PTCH1	c.728C>T	p.Ser243Phe	9	98244249	NM_000264	G	A	NA	8.29e-06	NFE: 1.51e-05	9.415e-06
	PTCH1	c.74G>C	p.Gly25Ala	9	98270570	NM_000264	C	G	NA	0.00003086	NFE: 0.00006252	1.078e-05
	PTCH1	c.884C>T	p.Pro295Leu	9	98242733	NM_000264	G	A	135908	4.942e-05	NFE: 8.99e-05	5.649e-05
	PTCH1	c.897G>A	p.Pro299Pro	9	98242720	NM_000264	C	T	237505	2.471e-05	EAS: 0.0001	2.825e-05
	PTCH1	c.943A>G	p.Lys315Glu	9	98242674	NM_000264	T	C	NA	0	0	0
	PTCH1	c.946-5T>A		9	98242377	NM_000264	A	T	367678	0	0	0
	PTCH1	c.973G>A	p.Gly325Ser	9	98242345	NM_000264	C	T	NA	0	0	0
	PTEN	c.132C>T	p.Gly44Gly	10	89653834	NM_000314	C	T	92813	0.0016	OTH: 0.0066	0.001271
	PTEN	c.235G>A	p.Ala79Thr	10	89690828	NM_000314	G	A	41682	0.0001	OTH: 0.0011	0.0001318
	RAD50	c.1094G>A	p.Arg365Gln	5	131924421	NM_005732	G	A	127990	0.0004	NFE: 0.0006	0.0003578
	RAD50	c.1211A>G	p.Gln404Arg	5	131924538	NM_005732	A	G	127992	0.0002	EAS: 0.0012	0.0001507
	RAD50	c.1336A>G	p.Lys446Glu	5	131925413	NM_005732	A	G	140939	0.0004	NFE: 0.0007	0.0004237
	RAD50	c.1911T>A	p.Asp637Glu	5	131930678	NM_005732	T	A	128000	4.122e-05	NFE: 7.495e-05	3.766e-05
	RAD50	c.2012C>T	p.Thr671Ile	5	131931307	NM_005732	C	T	NA	8.245e-06	NFE: 1.5e-05	0
	RAD50	c.203A>G	p.His68Arg	5	131895049	NM_005732	A	G	NA	0	0	0
	RAD50	c.214G>A	p.Val72Ile	5	131911469	NM_005732	G	A	141106	3.305e-05	EAS: 0.0003	3.766e-05
	RAD50	c.2177G>A	p.Arg726His	5	131931472	NM_005732	G	A	128001	0.0002	OTH: 0.0022	0.0001695
	RAD50	c.2288G>A	p.Arg763His	5	131939072	NM_005732	G	A	128003	0.0003	NFE: 0.0005	0.0003295
	RAD50	c.2397G>C	p.Gln799His	5	131939181	NM_005732	G	C	128004	0.0003	FIN: 0.0014	0.0003484
	RAD50	c.2525T>C	p.Val842Ala	5	131940498	NM_005732	T	C	128005	0.0002	AFR: 0.0004	0.0001224
	RAD50	c.2548C>T	p.Arg850Cys	5	131940521	NM_005732	C	T	128006	0.0003	AMR: 0.0018	0.0002825
	RAD50	c.2585A>G	p.His862Arg	5	131940558	NM_005732	A	G	37383	0	0	0
	RAD50	c.2647C>T	p.Arg883Cys	5	131940620	NM_005732	C	T	128008	0.0006	SAS: 0.0010	0.0005649
	RAD50	c.265G>A	p.Val89Ile	5	131911520	NM_005732	G	A	128010	5.774e-05	AFR: 9.619e-05	3.766e-05
	RAD50	c.280A>C	p.Ile94Leu	5	131911535	NM_005732	A	C	128012	0.0035	SAS: 0.0067	0.003484
	RAD50	c.3036+5G>A		5	131945093	NM_005732	G	A	37381	0.0010	AMR: 0.0032	0.0009417
	RAD50	c.3230G>A	p.Arg1077Gln	5	131953827	NM_005732	G	A	127004	3.305e-05	NFE: 5.999e-05	3.766e-05
	RAD50	c.3476-12_3476-10del		5	131973754	NM_005732	ATTC	A	267337	0.0016	AFR: 0.0144	0.001657
	RAD50	c.3767G>A	p.Arg1256His	5	131977884	NM_005732	G	A	186665	0	0	0
	RAD50	c.379G>A	p.Val127Ile	5	131915022	NM_005732	G	A	128023	0.0017	NFE: 0.0027	0.00161
	RAD50	c.671G>A	p.Arg224His	5	131915673	NM_005732	G	A	128026	0.0006	FIN: 0.0026	0.0006497
	RAD50	c.695C>A	p.Asp380Asp	5	131915697	NM_005732	C	A	185142	6.607e-05	OTH: 0.0011	4.708e-05
	RAD50	c.943G>T	p.Val315Leu	5	131923673	NM_005732	G	T	128028	0.0013	NFE: 0.0020	0.001149
	RAD50	c.980G>A	p.Arg327His	5	131923710	NM_005732	G	A	37380	0.0035	SAS: 0.0079	0.003371
	RAD51	c.166C>T	p.Pro56Ser	15	40993340	NM_002875	C	T	NA	0.0001	NFE: 0.0003	0.0001412
	RAD51	c.364A>G	p.Ile122Val	15	41001243	NM_002875	A	G	NA	5.768e-05	AFR: 0.0007	6.591e-05
	RAD51C	c.1076C>T	p.Thr359Ile	17	56811528	NM_058216	C	T	NA	0	0	0
	RAD51C	c.428A>G	p.Gln143Arg	17	56774077	NM_058216	A	G	128205	4.118e-05	NFE: 7.492e-05	3.766e-05
	RAD51C	c.601C>G	p.Leu201Val	17	56780586	NM_058216	C	G	NA	1.652e-05	SAS: 6.072e-05	9.416e-06
	RAD51C	c.790G>A	p.Gly264Ser	17	56787304	NM_058216	G	A	128211	0.0019	NFE: 0.0031	0.001761
	RAD51C	c.859A>G	p.Thr287Ala	17	56798128	NM_058216	A	G	132702	0.0055	OTH: 0.0113	0.005056
	RB1	c.1129A>T	p.Thr377Ser	13	48947542	NM_000321	A	T	237658	0.0003	AFR: 0.0030	0.0002637
	RB1	c.113G>A	p.Gly38Asp	13	48878161	NM_000321	G	A	NA	0.0002	0	8.637e-05
	RB1	c.1156A>G	p.Met386Val	13	48947569	NM_000321	A	G	NA	2.477e-05	AFR: 0.0003	2.825e-05
	RB1	c.1574C>G	p.Ala525Gly	13	48955458	NM_000321	C	G	135118	0.0020	AFR: 0.0206	0.001874
	RB1	c.1967G>A	p.Arg656Gln	13	49033830	NM_000321	G	A	NA	9.065e-05	NFE: 0.0002	8.474e-05
	RB1	c.1988A>G	p.Asn663Ser	13	49033851	NM_000321	A	G	NA	0	0	0
	RB1	c.2455C>G	p.Leu819Val	13	49039470	NM_000321	C	G	312320	5.808e-05	0	5.65e-05
	RB1	c.2521-11G>A		13	49050826	NM_000321	G	A	312296	0.0065	OTH: 0.0089	0.006111
	RB1	c.2570G>A	p.Arg857His	13	49050886	NM_000321	G	A	NA	9.075e-05	AFR: 0.0004	8.474e-05
	RB1	c.367A>G	p.Asn123Asp	13	48916837	NM_000321	A	G	NA	6.626e-05	NFE: 0.0001	4.708e-05
	RB1	c.411A>T	p.Glu137Asp	13	48919246	NM_000321	A	T	41684	0.0004	OTH: 0.0011	0.0003673
	RB1	c.45_53delTGCCGCCGC	p.Ala16_A18del	13	48878084	NM_000321	CGCCGCCGCT	C	193082	0.0008	AFR: 0.0479	0.0007254
	RB1	c.52G>T	p.Ala18Ser	13	48878100	NM_000321	G	T	237674	0	0	7.252e-05
	RB1	c.59C>T	p.Pro20Leu	13	48878107	NM_000321	C	T	135115	0	0	0
	RB1	c.628G>T	p.Asp210Tyr	13	48934173	NM_000321	G	T	41685	0.0001	NFE: 0.0002	0.0001036
	RB1	c.812C>T	p.Thr271Ile	13	48937044	NM_000321	C	T	NA	0	0	0
	RB1	c.862-15C>A		13	48939015	NM_000321	C	A	312286	0.0016	AFR: 0.0132	0.0005564
	RECQL4	c.1063C>T	p.Arg355Trp	8	145741440	NM_004260	G	A	NA	1.678e-05	NFE: 3.056e-05	1.89e-05
	RECQL4	c.1090G>A	p.Val364Met	8	145741413	NM_004260	C	T	135166	0.0015	AFR: 0.0170	0.001484
	RECQL4	c.1115G>C	p.Arg372Thr	8	145741388	NM_004260	C	G	135167	0.0003	EAS: 0.0042	0.0003497
	RECQL4	c.1151G>A	p.Arg384Gln	8	145741255	NM_004260	C	T	135170	0.0001	AFR: 0.0012	0.0001135
	RECQL4	c.1237_1238delinsAG	p.Ala413Arg	8	145741168	NM_004260	GC	CT	135169	0.0009	SAS: 0.0050	0
	RECQL4	c.1237G>A	p.Ala413Thr	8	145741169	NM_004260	C	T	NA	0.0009	SAS: 0.0050	0.0009644
	RECQL4	c.1238C>G	p.Ala413Gly	8	145741168	NM_004260	G	C	NA	0.0009	SAS: 0.0050	0
	RECQL4	c.1258+6A>T		8	145741142	NM_004260	T	A	NA	0.0247	NFE: 0.0357	0.023
	RECQL4	c.127C>T	p.Arg43Trp	8	145742884	NM_004260	G	A	NA	7.416e-05	EAS: 0.0007	3.872e-05
	RECQL4	c.1348G>A	p.Val450Met	8	145740752	NM_004260	C	T	239695	0.0002	AMR: 0.0005	0.0001985
	RECQL4	c.1564C>T	p.Arg522Cys	8	145740376	NM_004260	G	A	135173	0.0132	AMR: 0.1334	0.013
	RECQL4	c.1570C>T	p.Pro524Ser	8	145740370	NM_004260	G	A	288908	4.862e-05	NFE: 6.944e-05	4.721e-05
	RECQL4	c.1576C>T	p.Leu526Phe	8	145740364	NM_004260	G	A	135174	0.0007	OTH: 0.0014	0.0005569
	RECQL4	c.161A>G	p.Gln54Arg	8	145742850	NM_004260	T	C	135157	0.0054	AFR: 0.0436	0.003428
	RECQL4	c.1684C>T	p.Arg562Trp	8	145739846	NM_004260	G	A	135128	0.0003	OTH: 0.0036	0.0003213
	RECQL4	c.1772C>T	p.Pro591Leu	8	145739679	NM_004260	G	A	135131	0.0082	AFR: 0.1015	0.00805
	RECQL4	c.1847A>G	p.Asn616Ser	8	145739604	NM_004260	T	C	239710	0.0005	AMR: 0.0025	0.0005102
	RECQL4	c.1868G>A	p.Arg623His	8	145739583	NM_004260	C	T	135133	0.0006	NFE: 0.0009	0.0004633
	RECQL4	c.1871T>C	p.Val624Ala	8	145739580	NM_004260	A	G	NA	5.18e-05	NFE: 9.411e-05	5.673e-05
	RECQL4	c.1954G>A	p.Val652Met	8	145739416	NM_004260	C	T	193964	0.0054	NFE: 0.0101	0.001861
	RECQL4	c.2031C>T	p.Ser677Ser	8	145739339	NM_004260	G	A	NA	0.0003	AFR: 0.0006	9.782e-05
	RECQL4	c.2107A>G	p.Ile703Val	8	145739048	NM_004260	T	C	NA	7.177e-05	NFE: 0.0001	3.969e-05
	RECQL4	c.212A>G	p.Glu71Gly	8	145742799	NM_004260	T	C	135158	0.0428	AMR: 0.1393	0.017
	RECQL4	c.2148C>G	p.Ile716Met	8	145739007	NM_004260	G	C	NA	0	0	0
	RECQL4	c.2420G>A	p.Arg807His	8	145738644	NM_004260	C	T	135139	0.0002	EAS: 0.0007	0.0001433
	RECQL4	c.2467G>A	p.Glu823Lys	8	145738518	NM_004260	C	T	135141	0.0002	NFE: 0.0003	0.0001715
	RECQL4	c.2569_2574delTGCACC	p.Cys857_T858del	8	145738410	NM_004260	TGGTGCA	T	135140	0.0048	AMR: 0.0694	0.003807
	RECQL4	c.2569_2574dupTGCACC	p.Cys857_Thr858dup	8	145738410	NM_004260	T	TGGTGCA	239738	0.0048	AMR: 0.0694	0.003807
	RECQL4	c.2601C>G	p.Ala867Ala	8	145738384	NM_004260	G	C	239742	0.0022	AFR: 0.0223	0.0008357
	RECQL4	c.2636C>A	p.Pro879His	8	145738349	NM_004260	G	T	94890	0.0111	OTH: 0.0317	0.00509
	RECQL4	c.2740G>A	p.Asp914Asn	8	145738245	NM_004260	C	T	NA	2.931e-05	NFE: 5.361e-05	1.891e-05
	RECQL4	c.2747C>T	p.Pro916Leu	8	145738238	NM_004260	G	A	NA	0.0005	NFE: 0.0008	0.000293
	RECQL4	c.2755+17->T		8	145738213	NM_004260	T	TA	NA	0.0015	AFR: 0.0187	0.001115
	RECQL4	c.275C>T	p.Ser92Phe	8	145742513	NM_004260	G	A	197231	0.0022	AFR: 0.0261	0.002217
	RECQL4	c.2760C>G	p.Ile920Met	8	145738150	NM_004260	G	C	290749	8.985e-06	0	9.444e-06
	RECQL4	c.2967G>A	p.Met989Ile	8	145737863	NM_004260	C	T	239751	0.0002	NFE: 0.0003	0.000189
	RECQL4	c.3011G>A	p.Arg1004Gln	8	145737819	NM_004260	C	T	NA	7.765e-05	EAS: 0.0004	6.616e-05
	RECQL4	c.3055+5G>A		8	145737770	NM_004260	C	T	NA	0.0002	NFE: 0.0003	0.000189
	RECQL4	c.3058G>A	p.Val1020Met	8	145737705	NM_004260	C	T	135146	0.0019	AFR: 0.0062	0.001918
	RECQL4	c.3062G>A	p.Arg1021Gln	8	145737701	NM_004260	C	T	135147	0.0040	NFE: 0.0065	0.003571
	RECQL4	c.3065G>T	p.Arg1022Leu	8	145737698	NM_004260	C	A	290749	0	0	0
	RECQL4	c.309G>A	p.Pro103Pro	8	145742479	NM_004260	C	T	239756	0.0066	FIN: 0.0319	0.006762
	RECQL4	c.3184C>G	p.Arg1062Gly	8	145737579	NM_004260	G	C	290749	0	0	0
	RECQL4	c.3313G>A	p.Gly1105Ser	8	145737374	NM_004260	C	T	135150	0.0010	AFR: 0.0124	0.0008981
	RECQL4	c.3314G>A	p.Gly1105Asp	8	145737373	NM_004260	C	T	135151	0.0054	OTH: 0.0078	0.004812
	RECQL4	c.3317G>A	p.Arg1106His	8	145737370	NM_004260	C	T	NA	0.0003	AFR: 0.0020	0.0002363
	RECQL4	c.337C>A	p.Leu113Met	8	145742451	NM_004260	G	T	NA	0.0001	AMR: 0.0003	0.0001511
	RECQL4	c.3392G>A	p.Arg1131Lys	8	145737295	NM_004260	C	T	239761	0.0007	AFR: 0.0081	0.0007171
	RECQL4	c.3393+8_3393+9delinsTG		8	145737285	NM_004260	TG	CA	290749	0.0226	FIN: 0.0333	0
	RECQL4	c.3435G>C	p.Gln1145His	8	145737131	NM_004260	C	G	135154	0.0034	FIN: 0.0089	0.003518
	RECQL4	c.3443C>T	p.Ser1148Phe	8	145737123	NM_004260	G	A	135153	0.0015	SAS: 0.0033	0.001518
	RECQL4	c.3457_3459delGAG	p.Glu1153del	8	145737106	NM_004260	TCTC	T	290749	3.366e-05	SAS: 0.0002	2.83e-05
	RECQL4	c.3485G>C	p.Arg1162Pro	8	145737081	NM_004260	C	G	290749	8.448e-06	0	9.445e-06
	RECQL4	c.3622C>T	p.Arg1208Cys	8	145736819	NM_004260	G	A	239771	0.0006	OTH: 0.0011	0.0005287
	RECQL4	c.371G>A	p.Gly124Asp	8	145742132	NM_004260	C	T	NA	1.875e-05	NFE: 3.233e-05	9.716e-06
	RECQL4	c.385C>T	p.Pro129Ser	8	145742118	NM_004260	G	A	239773	8.426e-05	NFE: 0.0001	8.687e-05
	RECQL4	c.445C>T	p.Pro149Ser	8	145742058	NM_004260	G	A	NA	4.625e-05	SAS: 8.706e-05	4.734e-05
	RECQL4	c.464T>A	p.Val155Asp	8	145742039	NM_004260	A	T	NA	0	0	0
	RECQL4	c.514C>T	p.Leu172Phe	8	145741989	NM_004260	G	A	NA	0.0001	AFR: 0.0019	0.000142
	RECQL4	c.716C>T	p.Ala239Val	8	145741787	NM_004260	G	A	135164	0.0010	NFE: 0.0015	0.0008711
	RECQL4	c.755C>T	p.Pro252Leu	8	145741748	NM_004260	G	A	135165	0.0064	SAS: 0.0452	0.006933
	RECQL4	c.82C>A	p.Gln28Lys	8	145743087	NM_004260	G	T	NA	0	0	0
	RECQL4	c.944C>T	p.Ser315Leu	8	145741559	NM_004260	G	A	NA	5.853e-05	AFR: 0.0006	5.667e-05
	RECQL4	c.974C>T	p.Ser325Phe	8	145741529	NM_004260	G	A	NA	0	0	0
	RET	c.1118C>T	p.Ala373Val	10	43604533	NM_020975	C	T	188268	0.0007	SAS: 0.0048	0.0008191
	RET	c.1124T>A	p.Leu375Gln	10	43604539	NM_020975	T	A	220574	0.0001	AFR: 0.0015	0.0001318
	RET	c.1154G>A	p.Gly385Glu	10	43604569	NM_020975	G	A	NA	0	0	0
	RET	c.1158G>A	p.Ala386Ala	10	43604573	NM_020975	G	A	136095	0.0004	NFE: 0.0007	0.0003295
	RET	c.139G>A	p.Gly47Ser	10	43595972	NM_020975	G	A	241335	2.485e-05	AFR: 0.0002	2.825e-05
	RET	c.1531G>A	p.Glu511Lys	10	43607555	NM_020975	G	A	24883	0.0002	NFE: 0.0004	0.0001133
	RET	c.166C>A	p.Leu56Met	10	43595999	NM_020975	C	A	36723	0.0025	NFE: 0.0041	0.002194
	RET	c.1681A>C	p.Ser561Arg	10	43608333	NM_020975	A	C	368899	1.659e-05	NFE: 3.022e-05	1.883e-05
	RET	c.1699G>A	p.Asp567Asn	10	43608351	NM_020975	G	A	136103	0.0002	OTH: 0.0011	0.0001601
	RET	c.1894G>A	p.Glu632Lys	10	43609942	NM_020975	G	A	24920	9.106e-05	SAS: 0.0006	0.0001036
	RET	c.1946C>T	p.Ser649Leu	10	43609994	NM_020975	C	T	24928	0.0003	OTH: 0.0011	0.0002636
	RET	c.1998G>C	p.Lys666Asn	10	43610046	NM_020975	G	C	230926	8.242e-06	0	9.415e-06
	RET	c.2225C>T	p.Thr742Met	10	43612120	NM_020975	C	T	187701	2.471e-05	NFE: 4.495e-05	2.825e-05
	RET	c.2249C>G	p.Ala750Gly	10	43612144	NM_020975	C	G	NA	8.238e-06	SAS: 6.056e-05	9.415e-06
	RET	c.2298G>A	p.Pro766Pro	10	43613834	NM_020975	G	A	220687	7.603e-05	NFE: 0.0001	7.532e-05
	RET	c.2372A>T	p.Tyr791Phe	10	43613908	NM_020975	A	T	13936	0.0018	FIN: 0.0058	0.001619
	RET	c.3005G>A	p.Ser1002Asn	10	43620396	NM_020975	G	A	241355	4.945e-05	NFE: 9e-05	3.766e-05
	RET	c.3112A>G	p.Thr1038Ala	10	43622095	NM_020975	A	G	136115	0.0005	OTH: 0.0033	0.0003954
	RET	c.3256G>A	p.Gly1086Arg	10	43623628	NM_020975	G	A	NA	2.471e-05	NFE: 4.495e-05	1.883e-05
	RET	c.375C>A	p.Val125Val	10	43597827	NM_020975	C	A	95997	0.0067	OTH: 0.0110	0.006224
	RET	c.405C>T	p.Gly135Gly	10	43597857	NM_020975	C	T	NA	0.0002	AFR: 0.0018	0.0001977
	RET	c.868-18G>A		10	43601806	NM_020975	G	A	220722	0.0028	AFR: 0.0325	0.002675
	RET	c.961G>A	p.Gly321Arg	10	43601917	NM_020975	G	A	24881	0.0001	EAS: 0.0002	0.0001036
	RUNX1	c.1005G>T	p.Gln335His	21	36164870	NM_001754	C	A	239039	0.0003	EAS: 0.0036	0.0001326
	RUNX1	c.1190A>G	p.Gln397Arg	21	36164685	NM_001754	T	C	NA	0.0003	EAS: 0.0068	8.822e-05
	RUNX1	c.1354G>C	p.Val452Leu	21	36164521	NM_001754	C	G	NA	0	0	0
	RUNX1	c.144C>T	p.Ser48Ser	21	36259347	NM_001754	G	A	239043	0.0039	FIN: 0.0351	0.003949
	RUNX1	c.155T>A	p.Met52Lys	21	36259336	NM_001754	A	T	239044	0.0002	NFE: 0.0004	0.0001897
	RUNX1	c.18A>G	p.Ile6Met	21	36421179	NM_001754	T	C	NA	0.0001	NFE: 0.0003	0.0001318
	RUNX1	c.749G>A	p.Arg250His	21	36206763	NM_001754	C	T	239055	4.951e-05	NFE: 8.999e-05	5.649e-05
	SDHA	c.113A>T	p.Asp38Val	5	223646	NM_004168	A	T	224957	0.0353	SAS: 0.0568	0.035
	SDHA	c.133G>A	p.Ala45Thr	5	223666	NM_004168	G	A	224947	0.0006	NFE: 0.0009	0.0006026
	SDHA	c.136A>G	p.Lys46EGlu	5	223669	NM_004168	A	G	224951	0.0004	AFR: 0.0043	0.0003954
	SDHA	c.1413C>T	p.Ile471Ile	5	236695	NM_004168	C	T	224956	0.0022	NFE: 0.0033	0.0021
	SDHA	c.146A>G	p.Asp49Gly	5	223679	NM_004168	A	G	141767	0.0008	AFR: 0.0094	0.0008191
	SDHA	c.1973C>T	p.Pro658Leu	5	256513	NM_004168	C	T	231183	8.238e-05	OTH: 0.0011	9.415e-05
	SDHA	c.1979C>G	p.Ala660Gly	5	256519	NM_004168	C	G	239660	0.0001	AMR: 0.0005	0.0001036
	SDHA	c.313-19G>T		5	225515	NM_004168	G	T	353209	0.0021	NFE: 0.0033	0.00193
	SDHA	c.442G>A	p.Ala148Thr	5	225663	NM_004168	G	A	239668	2.504e-05	AFR: 0.0003	2.825e-05
	SDHA	c.512G>A	p.Arg171His	5	226053	NM_004168	G	A	141875	8.24e-06	SAS: 6.056e-05	9.415e-06
	SDHA	c.550G>A	p.Gly184Arg	5	226091	NM_004168	G	A	221062	0.0016	EAS: 0.0210	0.001667
	SDHA	c.704T>C	p.Ile235Thr	5	228382	NM_004168	T	C	221076	8.237e-05	NFE: 0.0001	5.649e-05
	SDHA	c.739A>G	p.Ile247Val	5	228417	NM_004168	A	G	232828	0.0001	EAS: 0.0015	0.0001224
	SDHA	c.822C>T	p.Gly274Gly	5	231042	NM_004168	C	T	224953	0.0046	AFR: 0.0253	0.004406
	SDHA	c.969C>T	p.Gly323Gly	5	233665	NM_004168	C	T	141242	0.0070	SAS: 0.0220	0.007231
	SDHAF2	c.97C>T	p.Arg33Cys	11	61205157	NM_017841	C	T	41837	0.0005	EAS: 0.0061	0.0005178
	SDHB	c.158G>A	p.Gly53Glu	1	17371298	NM_003000	C	T	184148	0.0005	NFE: 0.0008	0.0004049
	SDHB	c.178A>G	p.Thr60Ala	1	17371278	NM_003000	T	C	239423	7.414e-05	NFE: 0.0001	7.532e-05
	SDHB	c.423+20T>A		1	17355075	NM_003000	A	T	NA	0.0031	SAS: 0.0089	0.003051
	SDHB	C.424-19_424-14del		1	17354373	NM_003000	GGAAGAA	G	NA	0.0042	OTH: 0.0074	0
	SDHB	c.487T>C	p.Ser163Pro	1	17354297	NM_003000	A	G	12792	0.0125	FIN: 0.0233	0.013
	SDHB	c.701T>A	p.Leu234Gln	1	17349167	NM_003000	A	T	186390	0	0	0
	SDHB	c.716C>G	p.Ser239Cys	1	17349152	NM_003000	G	C	161385	0.0001	0	0.0001224
	SDHB	c.79C>G	p.Arg27Gly	1	17371377	NM_003000	G	C	161386	4.183e-05	NFE: 7.606e-05	3.766e-05
	SDHB	c.8C>G	p.Ala3Gly	1	17380507	NM_003000	G	C	12791	0.0044	AFR: 0.0510	0.003825
	SDHC	c.263C>T	p.Ser88Leu	1	161326488	NM_003001	C	T	NA	1.648e-05	NFE: 2.997e-05	9.415e-06
	SDHD	c.149A>G	p.His50Arg	11	111958677	NM_003002	A	G	6909	0.0065	NFE: 0.0093	0.006562
	SDHD	c.278A>G	p.Tyr93Cys	11	111959699	NM_003002	A	G	135197	9.884e-05	AFR: 0.0010	0.0001036
	SDHD	c.34G>A	p.Gly12Ser	11	111957665	NM_003002	G	A	6895	0.0073	OTH: 0.0111	0.006807
	SDHD	c.53C>T	p.Ala18Val	11	111958581	NM_003002	C	T	302481	8.237e-05	NFE: 0.0001	5.649e-05
	SDHD	c.80G>A	p.Arg27Lys	11	111958608	NM_003002	G	A	302482	0.0001	SAS: 0.0008	0.0001224
	SMAD3	c.1144G>A	p.Ala382Thr	15	67479837	NM_005902	G	A	NA	0	0	0
	SMAD3	c.394A>G	p.Thr132Ala	15	67457420	NM_005902	A	G	213803	2.473e-05	NFE: 4.5e-05	9.415e-06
	SMAD3	c.636G>A	p.Met212Ile	15	67462920	NM_005902	G	A	252654	0.0002	NFE: 0.0003	0.0001506
	SMAD3	c.870C>T	p.Ile290Ile	15	67473790	NM_005902	C	T	139213	0.0165	NFE: 0.0226	0.016
	SMAD4	c.1573A>G	p.Ile525Val	18	48604751	NM_005359	A	G	41788	0.0007	AMR: 0.0023	0.0006873
	SMAD4	c.20C>T	p.Thr7Met	18	48573436	NM_005359	C	T	183733	6.604e-05	FIN: 0.0002	5.649e-05
	SMAD4	c.424+5G>A		18	48575235	NM_005359	G	A	NA	0.0002	NFE: 0.0003	0.000226
	SMAD4	c.451A>G	p.Asn151Asp	18	48575691	NM_005359	A	G	NA	0	0	0
	SMAD4	c.546C>G	p.Ile182Met	18	48581242	NM_005359	C	G	NA	0	0	0
	SMAD4	c.575C>T	p.Thr192Ile	18	48581271	NM_005359	C	T	136076	8.236e-06	NFE: 1.498e-05	9.415e-06
	SMAD4	c.667+17G>A		18	48581380	NM_005359	G	A	NA	1.653e-05	NFE: 3.009e-05	1.883e-05
	SMAD4	c.746_747delinsCC	p.Gln249Pro	18	48584573	NM_005359	CAG	CCC	369252	0.0001	SAS: 0.0002	0
	SMAD4	c.746A>C	p.Gln249Pro	18	48584573	NM_005359	A	C	142067	0.0001	SAS: 0.0002	0
	SMAD4	c.747G>C	p.Gln249His	18	48584574	NM_005359	G	C	142067	0.0001	SAS: 0.0002	0.000113
	SMAD4	c.800C>T	p.Thr267Ile	18	48584722	NM_005359	C	T	NA	0	0	0
	SMARCA4	c.1006C>A	p.Pro336Thr	19	11098488	NM_003072	C	A	220684	1.275e-05	NFE: 2.329e-05	9.531e-06
	SMARCA4	c.114C>T	p.Ser38Ser	19	11094941	NM_003072	C	T	NA	2.12e-05	NFE: 3.875e-05	1.887e-05
	SMARCA4	c.1419+9C>T		19	11102008	NM_003072	C	T	NA	0.001652	OTH: 0.0034	0.0008673
	SMARCA4	c.1765G>A	p.Ala589Thr	19	11107173	NM_003072	G	A	NA	8.237e-06	NFE: 1.498e-05	9.415e-06
	SMARCA4	c.2275-3C>A		19	11123622	NM_003072	C	A	212240	0.0028	NFE: 0.0043	0.00273
	SMARCA4	c.235A>G	p.Met79Val	19	11095961	NM_003072	A	G	238402	0	0	0
	SMARCA4	c.2388C>T	p.Leu796Leu	19	11123738	NM_003072	C	T	220858	0.0116	SAS: 0.0502	0.012
	SMARCA4	c.2973+14G>A		19	11134321	NM_003072	G	A	NA	0.0008	NFE: 0.001468	0.0004153
	SMARCA4	c.3045C>T	p.Gly1015Gly	19	11135078	NM_003072	C	T	212248	0.0014	NFE: 0.0024	0.001318
	SMARCA4	c.416C>T	p.Pro139Leu	19	11096925	NM_003072	C	T	238450	1.669e-05	EAS: 0.0001	1.883e-05
	SMARCA4	c.4508A>T	p.Lys1503Met	19	11169014	NM_003072	A	T	328048	1.663e-05	NFE: 3.034e-05	1.883e-05
	SMARCA4	c.458C>T	p.Pro153Leu	19	11096967	NM_003072	C	T	NA	2.543e-05	SAS: 6.118e-05	2.825e-05
	SMARCA4	c.4916G>A	p.Arg1639His	19	11172464	NM_003072	G	A	328048	0	0	0
	SMARCA4	c.54G>A	p.Pro18Pro	19	11094881	NM_003072	G	A	238505	0.0005	SAS: 0.0035	0.0005464
	SMARCA4	c.589C>T	p.Pro197Ser	19	11097098	NM_003072	C	T	135251	0.0057	FIN: 0.0231	0.002673
	SMARCA4	c.679G>A	p.Ala227Thr	19	11097188	NM_003072	G	A	NA	0	0	0
	SMARCA4	c.712_723delCCCGGCCCGGGT	p.238_241del	19	11097220	NM_003072	CCCCGGCCCGGGT	C	328048	0	SAS: 0	9.077e-05
	SMARCA4	c.761-5T>C		19	11097576	NM_003072	T	C	328048	4.98e-05	OTH: 0.0011	4.708e-05
	SMARCA4	c.859+7T>A		19	11097686	NM_003072	T	A	NA	0.0034	NFE: 0.01275	0.003401
	SMARCA4	c.914C>T	p.Pro305Leu	19	11098396	NM_003072	C	T	NA	9.487e-06	AMR: 9.486e-05	9.424e-06
	SMARCA4	c.981A>C	p.Pro327Pro	19	11098463	NM_003072	A	C	212262	0.0030	SAS: 0.0044	0.002504
	SMARCA4	c.986A>G	p.Gln329Arg	19	11098468	NM_003072	A	G	238536	1.308e-05	NFE: 2.4e-05	9.586e-06
	SMARCB1	c.1A>G	p.Met1Val	22	24129357	NM_003073	A	G	135257	0.0001	FIN: 0.0009	0.0001036
	STK11	c.1062C>G	p.Phe354Leu	19	1223125	NM_000455	C	G	7461	0.0058	EAS: 0.0365	0.004691
	STK11	c.1211C>T	p.Ser404Phe	19	1226555	NM_000455	C	T	127700	0.0009	NFE: 0.0016	0.000429
	STK11	c.334C>G	p.Gln112Glu	19	1218459	NM_000455	C	G	185602	8.305e-06	NFE: 1.505e-05	9.46e-06
	STK11	c.465-4G>A		19	1220368	NM_000455	G	A	127703	0.0002	SAS: 0.0007	9.464e-05
	STK11	c.49C>G	p.Leu17Val	19	1206961	NM_000455	C	G	NA	1.451e-05	AFR: 0.0002	9.453e-06
	STK11	c.559G>A	p.Gly187Ser	19	1220466	NM_000455	G	A	141815	2.697e-05	EAS: 0.0002	2.838e-05
	STK11	c.894C>A	p.Phe298Leu	19	1221979	NM_000455	C	A	127707	0.0002	AFR: 0.0018	0.0002145
	STK11	c.920+5G>A		19	1222010	NM_000455	G	A	NA	4.297e-05	AFR: 0.0005	3.965e-05
	STK11	c.928C>T	p.Arg310Trp	19	1222991	NM_000455	C	T	NA	5.508e-05	NFE: 0.0001	9.65e-06
	SUFU	c.1018G>T	p.Ala340Ser	10	104359297	NM_016169	G	T	135282	0.0061	FIN: 0.0106	0.005696
	SUFU	c.1028G>A	p.Arg343His	10	104375030	NM_016169	G	A	135285	0.0001	NFE: 0.0002	0.0001224
	SUFU	c.1058C>T	p.Thr353Met	10	104375060	NM_016169	C	T	NA	0.0002	NFE: 0.0003	0.0001412
	SUFU	c.1273G>A	p.Ala425Thr	10	104377162	NM_016169	G	A	NA	3.295e-05	NFE: 5.994e-05	2.825e-05
	SUFU	c.38C>T	p.Thr13Ile	10	104263947	NM_016169	C	T	NA	0	0	1.022e-05
	SUFU	c.472G>C	p.Gly158Arg	10	104352356	NM_016169	G	C	NA	0	0	0
	SUFU	c.625C>T	p.His209Tyr	10	104353420	NM_016169	C	T	NA	5.77e-05	SAS: 0.0004	6.591e-05
	TERT	c.1138C>T	p.Pro380Ser	5	1293863	NM_198253	G	A	242211	0.0012	EAS: 0.0209	0.0004202
	TERT	c.1234C>T	p.His412Tyr	5	1293767	NM_198253	G	A	12730	0.0063	NFE: 0.0153	0.002163
	TERT	c.1323G>T	p.Glu441Asp	5	1293678	NM_198253	C	A	NA	0	0	0
	TERT	c.1352T>A	p.Leu451Gln	5	1293649	NM_198253	A	T	NA	0	0	0
	TERT	c.1590G>A	p.Pro530Pro	5	1282723	NM_198253	C	T	NA	0	0	0
	TERT	c.2012G>A	p.Arg671Gln	5	1279524	NM_198253	C	T	NA	6.342e-05	NFE: 0.0002	3.138e-05
	TERT	c.2221G>T	p.Val741Leu	5	1278821	NM_198253	C	A	NA	1.648e-05	0	9.415e-06
	TERT	c.2228G>A	p.Arg743Gln	5	1278814	NM_198253	C	T	NA	1.648e-05	AFR: 9.612e-05	1.883e-05
	TERT	c.2371G>A	p.Val791Ile	5	1272311	NM_198253	C	T	242228	0.0002	NFE: 0.0003	0.0001134
	TERT	c.2775C>T	p.His925His	5	1264587	NM_198253	G	A	242230	0.0010	NFE: 0.0016	0.0008128
	TERT	c.2885G>A	p.Arg962His	5	1260674	NM_198253	C	T	NA	2.485e-05	AMR: 0.0003	2.833e-05
	TERT	c.3164C>T	p.Ser1055Leu	5	1254614	NM_198253	G	A	NA	0.0002	NFE: 0.0004	0.000227
	TERT	c.3257G>A	p.Arg1086His	5	1254521	NM_198253	C	T	242237	0.0002	OTH: 0.0011	0.000151
	TERT	c.3268G>A	p.Val1090Met	5	1254510	NM_198253	C	T	12733	5.864e-05	AMR: 0.0003	6.608e-05
	TERT	c.604G>A	p.Ala202Thr	5	1294397	NM_198253	C	T	12729	0.0003	AMR: 0.0020	0.0002578
	TERT	c.76A>G	p.Thr26Ala	5	1295029	NM_198253	T	C	NA	0	0	0
	TERT	c.810C>T	p.Phe270Phe	5	1294191	NM_198253	G	A	242245	4.301e-05	NFE: 7.981e-05	9.458e-06
	TERT	c.968C>G	p.Pro323Arg	5	1294033	NM_198253	G	C	NA	5.323e-05	NFE: 0.0001	2.233e-05
	TERT	c.969G>A	p.Pro323Pro	5	1294032	NM_198253	C	T	165380	0.0007	AFR: 0.0057	0.000281
	TGFBR1	c.1193G>A	p.Arg398His	9	101908829	NM_004612	G	A	NA	8.238e-06	NFE: 1.498e-05	9.415e-06
	TGFBR1	c.1313T>G	p.Val438Gly	9	101909993	NM_004612	T	G	NA	0	0	0
	TGFBR1	c.199C>T	p.His67Tyr	9	101891238	NM_004612	C	T	NA	8.264e-06	AFR: 9.621e-05	9.416e-06
	TGFBR1	c.415A>G	p.Ile139Val	9	101894862	NM_004612	A	G	177810	0.0002	OTH: 0.0011	0.0001601
	TGFBR1	c.457G>A	p.Val153Ile	9	101894904	NM_004612	G	A	213868	0.0011	NFE: 0.0017	0.001083
	TGFBR1	c.673C>T	p.Arg225Trp	9	101900239	NM_004612	C	T	NA	0	0	0
	TGFBR2	c.1060G>A	p.Ala354Thr	3	30713660	NM_001024847	G	A	161395	5.771e-05	AFR: 9.625e-05	6.591e-05
	TGFBR2	c.118G>A	p.Asp40Asn	3	30664714	NM_001024847	G	A	44653	0.0016	FIN: 0.0039	0.001544
	TGFBR2	c.1194G>A	p.Met398Ile	3	30713794	NM_001024847	G	A	36859	0.0014	AMR: 0.0043	0.001309
	TGFBR2	c.1234G>T	p.Val412Leu	3	30713834	NM_001024847	G	T	36862	0.0004	SAS: 0.0006	0.0003672
	TGFBR2	c.1732T>A	p.Ser578Thr	3	30733044	NM_001024847	T	A	161394	0.0014	NFE: 0.0025	0.001299
	TGFBR2	c.4G>T	p.Gly2Cys	3	30648379	NM_001024847	G	T	239531	0.0003	AFR: 0.0026	6.644e-05
	TGFBR2	c.724G>C	p.Ala242Pro	3	30713324	NM_001024847	G	C	263839	0.0001	AFR: 0.0012	0.000113
	TGFBR2	c.91T>G	p.Ser31Ala	3	30648466	NM_001024847	T	G	NA	2.07e-05	AFR: 0.0003	9.473e-06
	TMEM127	c.208G>A	p.Asp70Asn	2	96930912	NM_001193304	C	T	126964	0.0004	AFR: 0.0050	0.0003015
	TMEM127	c.266C>T	p.Thr89Ile	2	96920714	NM_001193304	G	A	NA	0	0	0
	TMEM127	c.268G>A	p.Val90Met	2	96920712	NM_001193304	C	T	136209	0.0008	AFR: 0.0084	0.0008474
	TP53	c.1000G>C	p.Gly334Arg	17	7574027	NM_000546	C	G	182969	8.628e-06	NFE: 1.556e-05	0
	TP53	c.1079G>C	p.Gly360Ala	17	7573948	NM_000546	C	G	142003	0.0003	AMR: 0.0008	0.0002825
	TP53	c.1093C>T	p.His365Tyr	17	7573934	NM_000546	G	A	80708	9.138e-06	NFE: 1.631e-05	0
	TP53	c.139C>T	p.Pro47Ser	17	7579548	NM_000546	G	A	43588	0.0017	AFR: 0.0184	0.001704
	TP53	c.31G>C	p.Glu11Gln	17	7579882	NM_000546	C	G	41723	3.364e-05	EAS: 0.0005	3.766e-05
	TP53	c.704A>G	p.Asn235Ser	17	7577577	NM_000546	T	C	127821	0.0002	FIN: 0.0009	0.0002542
	TSC1	c.1079C>A	p.Thr360Asn	9	135786451	NM_000368	G	T	41687	0.0006	OTH: 0.0011	0.0005273
	TSC1	c.1208C>T	p.Ser403Leu	9	135786013	NM_000368	G	A	48751	0.0004	NFE: 0.0006	0.0003766
	TSC1	c.121C>T	p.Leu41Phe	9	135802677	NM_000368	G	A	NA	8.587e-06	NFE: 1.551e-05	9.415e-06
	TSC1	c.1273A>G	p.Met425Val	9	135782748	NM_000368	T	C	NA	2.474e-05	EAS: 0.0003	2.825e-05
	TSC1	c.1721C>G	p.Thr574Ser	9	135781244	NM_000368	G	C	207609	1.648e-05	NFE: 2.999e-05	9.415e-06
	TSC1	c.1814A>G	p.Asp605Gly	9	135781151	NM_000368	T	C	NA	0	0	0
	TSC1	c.1916G>T	p.Gly639Val	9	135781049	NM_000368	C	A	NA	3.295e-05	NFE: 5.993e-05	2.825e-05
	TSC1	c.1936A>G	p.Met646Val	9	135781029	NM_000368	T	C	141699	0.0003	SAS: 0.0012	0.0002636
	TSC1	c.2075G>A	p.Arg692Gln	9	135779171	NM_000368	C	T	41694	0.0002	EAS: 0.0014	0.0002071
	TSC1	c.2194C>T	p.His732Tyr	9	135779052	NM_000368	G	A	5103	0.0039	FIN: 0.0145	0.003973
	TSC1	c.250G>A	p.Ala84Thr	9	135801087	NM_000368	C	T	48972	0.0007	EAS: 0.0045	0.0007061
	TSC1	c.2636T>C	p.Met879Thr	9	135772987	NM_000368	A	G	NA	1.67e-05	EAS: 0.0002	1.884e-05
	TSC1	c.2654G>A	p.Arg885Gln	9	135772969	NM_000368	C	T	195563	4.163e-05	AFR: 0.0002	4.708e-05
	TSC1	c.2723G>A	p.Arg908Gln	9	135772900	NM_000368	C	T	NA	8.252e-06	NFE: 1.501e-05	9.415e-06
	TSC1	c.2968G>A	p.Glu990Lys	9	135772578	NM_000368	C	T	237714	1.648e-05	NFE: 2.997e-05	1.883e-05
	TSC1	c.2984G>A	p.Cys995Tyr	9	135772133	NM_000368	C	T	NA	8.576e-06	NFE: 1.569e-05	9.498e-06
	TSC1	c.3005A>T	p.Asp1002Val	9	135772112	NM_000368	T	A	237715	1.702e-05	NFE: 3.107e-05	1.886e-05
	TSC1	c.3103G>A	p.Gly1035Ser	9	135772014	NM_000368	C	T	41696	0.0014	OTH: 0.0034	0.001224
	TSC1	c.3127_3129dupAGC	p.p.Ser1043dup	9	135771987	NM_000368	C	CGCT	41697	0.0015	AMR: 0.0020	0
	TSC2	c.1066G>C	p.Val356Leu	16	2110761	NM_000548	G	C	135370	4.964e-05	AFR: 9.641e-05	2.825e-05
	TSC2	c.1070C>T	p.Ala357Val	16	2110765	NM_000548	C	T	41724	0.0005	OTH: 0.0011	0.0004143
	TSC2	c.1110G>A	p.Gln370Gln	16	2110805	NM_000548	G	A	49141	0.0110	NFE: 0.0165	0.011
	TSC2	c.1377C>T	p.Gly459Gly	16	2112988	NM_000548	C	T	49154	0.0004	AMR: 0.0026	0.000187
	TSC2	c.1378G>A	p.Ala460Thr	16	2112989	NM_000548	G	A	49660	0.0024	NFE: 0.0054	0.0009654
	TSC2	c.1384C>T	p.Arg462Cys	16	2112995	NM_000548	C	T	65350	0	0	0
	TSC2	c.1387A>G	p.Ile463Val	16	2112998	NM_000548	A	G	49674	0.0003	AMR: 0.0025	0.0001119
	TSC2	c.1391A>G	p.Lys464Arg	16	2113002	NM_000548	A	G	NA	0	0	0
	TSC2	c.1562C>G	p.Thr521Arg	16	2114391	NM_000548	C	G	318342	0	0	0
	TSC2	c.1574A>G	p.Asn525Ser	16	2114403	NM_000548	A	G	49681	1.654e-05	AFR: 9.649e-05	1.883e-05
	TSC2	c.1751C>T	p.Thr584Met	16	2120491	NM_000548	C	T	207663	1.662e-05	AMR: 8.658e-05	1.883e-05
	TSC2	c.1754G>A	p.Arg585His	16	2120494	NM_000548	G	A	65084	2.494e-05	EAS: 0.0002	1.883e-05
	TSC2	c.2032G>A	p.Ala678Thr	16	2121870	NM_000548	G	A	184135	0.0019	EAS: 0.0236	0.0009046
	TSC2	c.2035G>A	p.Val679Met	16	2121873	NM_000548	G	A	237976	0.0001	EAS: 0.0003	4.75e-05
	TSC2	c.2071C>T	p.Arg691Cys	16	2121909	NM_000548	C	T	184386	6.939e-05	OTH: 0.0032	2.841e-05
	TSC2	c.2153G>C	p.Arg718Pro	16	2122297	NM_000548	G	C	49597	0.0001	0	0.0001224
	TSC2	c.251C>A	p.Ala84Glu	16	2103368	NM_000548	C	A	NA	0.0006	NFE: 0.0009	0
	TSC2	c.251C>T	p.Ala84Val	16	2103368	NM_000548	C	T	49212	0.0006	NFE: 0.0009	0
	TSC2	c.272C>T	p.Pro91Leu	16	2103389	NM_000548	C	T	49225	0.0013	OTH: 0.0034	0.0004839
	TSC2	c.275A>T	p.Glu92Val	16	2103392	NM_000548	A	T	50116	0.0019	FIN: 0.0053	0.0008064
	TSC2	c.2846T>C	p.Ile949Thr	16	2127607	NM_000548	T	C	NA	0	0	0
	TSC2	c.322A>G	p.Ile108Val	16	2103439	NM_000548	A	G	NA	0	0	0
	TSC2	c.3293C>T	p.Pro1098Leu	16	2129566	NM_000548	C	T	NA	1.067e-05	NFE: 1.92e-05	9.424e-06
	TSC2	c.3430G>A	p.Val1144Met	16	2130198	NM_000548	G	A	41733	0.0002	AFR: 0.0005	0.000226
	TSC2	c.3475C>T	p.Arg1159Trp	16	2130243	NM_000548	C	T	49754	0.0004	EAS: 0.0051	0.0004331
	TSC2	c.3542C>G	p.Thr1181Arg	16	2130310	NM_000548	C	G	318342	0	0	0
	TSC2	c.3768G>A	p.Pro1256Pro	16	2131753	NM_000548	G	A	281623	4.186e-05	EAS: 0.0001	3.766e-05
	TSC2	c.3770C>T	p.Ala1257Val	16	2131755	NM_000548	C	T	41734	0.0002	NFE: 0.0003	0.0001883
	TSC2	c.3827C>T	p.Ser1276Phe	16	2132449	NM_000548	C	T	41735	0.0002	OTH: 0.0023	0.0002354
	TSC2	c.3884-17C>G		16	2133679	NM_000548	C	G	49513	0.0011	FIN: 0.0035	0.0004303
	TSC2	c.3919G>A	p.Glu1307Lys	16	2133731	NM_000548	G	A	238031	0.0001	AFR: 0.0010	7.543e-05
	TSC2	c.4216G>A	p.Asp1406Asn	16	2134439	NM_000548	G	A	NA	5.833e-05	AMR: 0.0002	1.885e-05
	TSC2	c.4226G>A	p.Arg1409Gln	16	2134449	NM_000548	G	A	207683	4.922e-05	SAS: 0.0002	4.713e-05
	TSC2	c.4226G>T	p.Arg1409Leu	16	2134449	NM_000548	G	T	318342	4.922e-05	SAS: 0.0002	4.713e-05
	TSC2	c.4298C>T	p.Ser1433Leu	16	2134521	NM_000548	C	T	65193	1.007e-05	NFE: 1.838e-05	9.438e-06
	TSC2	c.433G>A	p.Ala145Thr	16	2104393	NM_000548	G	A	NA	4.119e-05	OTH: 0.0011	3.766e-05
	TSC2	c.4397C>T	p.Ser1466Leu	16	2134620	NM_000548	C	T	238048	1.743e-05	EAS: 0.0001	1.888e-05
	TSC2	c.4527_4529delCTT	p.Phe1510del	16	2134981	NM_000548	CCTT	C	49302	0.0053	SAS: 0.0094	0.005367
	TSC2	c.4527C>G	p.Phe1509Leu	16	2134985	NM_000548	C	G	NA	0	0	0
	TSC2	c.4635C>G	p.Ile1545Met	16	2135296	NM_000548	C	G	318342	0	0	0
	TSC2	c.4678G>A	p.Ala1560Thr	16	2136209	NM_000548	G	A	NA	8.389e-06	EAS: 0.0001	9.416e-06
	TSC2	c.5094C>A	p.Ser1698Arg	16	2138074	NM_000548	C	A	49451	0.0004	AFR: 0.0040	0.0003295
	TSC2	c.5176C>T	p.His1726Tyr	16	2138243	NM_000548	C	T	318342	8.303e-06	EAS: 0.0001	9.415e-06
	TSC2	c.5210C>T	p.Pro1737Leu	16	2138277	NM_000548	C	T	NA	8.311e-06	NFE: 1.519e-05	0
	TSC2	c.5383C>T	p.Arg1795Cys	16	2138570	NM_000548	C	T	41748	0.0012	OTH: 0.0035	0.001102
	TSC2	c.600_601delinsCT	p.Gln200_M201delinsHLeu	16	2106197	NM_000548	GA	CT	318342	0	0	0
	TSC2	c.601A>T	p.Met201Leu	16	2106198	NM_000548	A	T	NA	0	0	0
	TSC2	c.947C>A	p.Pro316Gln	16	2108846	NM_000548	C	A	238099	1.397e-05	NFE: 2.576e-05	9.418e-06
	VHL	c.104C>A	p.Ala35Asp	3	10183635	NM_000551	C	A	132707	0	0	0
	VHL	c.154G>A	p.Glu52Lys	3	10183685	NM_000551	G	A	161402	0.0002	AFR: 0.0027	0.0001057
	VHL	c.183C>G	p.Pro61Pro	3	10183714	NM_000551	C	G	135951	0.0025	SAS: 0.0047	0.001039
	WT1	c.1048T>C	p.Cys350Arg	11	32421544	NM_024426	A	G	41847	0.0005	OTH: 0.0011	0.0004331
	WT1	c.108G>C	p.Pro36Pro	11	32456784	NM_024426	C	G	193453	0.0034	OTH: 0.0083	0.0009137
	WT1	c.1175T>C	p.Met392Thr	11	32417877	NM_024426	A	G	NA	0	0	0
	WT1	c.1292G>A	p.Arg431Lys	11	32414259	NM_024426	C	T	NA	0	0	0
	WT1	c.147C>G	p.Ser49Arg	11	32456745	NM_024426	G	C	304429	0	SAS: 0	3.4e-05
	WT1	c.14C>T	p.Ala5Val	11	32456878	NM_024426	G	A	NA	0	0	0
	WT1	c.178G>A	p.Gly60Arg	11	32456714	NM_024426	C	T	241478	0.0002	0	8.963e-05
	WT1	c.201G>T	p.Gln67His	11	32456691	NM_024426	C	A	241479	0.0032	0	0.0004872
	WT1	c.745C>T	p.Pro249Ser	11	32450067	NM_024426	G	A	135453	0.0004	FIN: 0.0008	0.0003954
	WT1	c.974C>T	p.Ser325Leu	11	32438063	NM_024426	G	A	NA	8.251e-06	NFE: 1.501e-05	9.415e-06
	REF	Signifies reference sequence.
	ALT	Indicates alternative sequence.
	ClinVar ID	Indicates variant identification number in ClinVar database.
	ExAC	Signifies Exome Aggregation Consortium.
	AFR	Indicates the African population.
	AMR	Signifies the Admixed American population.
	EAS	Indicates the East Asian population.
	FIN	Signifies the European (Finnish) population.
	NFE	Indicates the European (non-Finnish) population.
	OTH	Signifies the population of unspecified ancestry in ExAC.
	SAS	Indicates the South Asian population.
